# Supplementary material for: Diastereoselective assembly of dispiro-cyclopentene-linked bisoxindoles via annulation involving isatylidene malononitriles and benzylamines
Source: Royal Society of Chemistry journal article supplement (doi:10.1039/d4ob01811g), 2025-01-01

*Supporting Information for*

**Diastereoselective Assembly of Dispiro-cyclopentene-linked Bisoxindoles *via*  
Annulation Involving Isatylidene Malononitriles and Benzylamines**

**Issa Yavari\*, Mahmoud Ahmadi, Parisa Ravaghi, and Ramin Mohsenzadeh**

Email: yavarisa@modares.ac.ir

Department of Chemistry, Tarbiat Modares University, P. O. Box 14115-175, Tehran, Iran

**Table of Contents**

|                                                                           |     |
|---------------------------------------------------------------------------|-----|
| 1. General information .....                                              | S2  |
| 2. General Procedure for Preparations of Isatylidene Malononitriles ..... | S2  |
| 3. General Procedure for the Synthesis of Products .....                  | S3  |
| 4. Gram-Scale Reaction for the Synthesis of <b>3a</b> .....               | S3  |
| 5. X-Ray Crystal Structure and Data of Compound <b>3a</b> .....           | S4  |
| 6. Characterization of Products .....                                     | S6  |
| 7. NMR Spectra .....                                                      | S15 |

## 1. General Information

**General Experimental Information.** All solvents and chemicals used in this study were of analytical grade and employed without any additional purification steps. The melting points of substances were determined using an Electrothermal 9100 apparatus. Infrared (IR) spectra recorded using a Shimadzu-IR 460 spectrophotometer ( $\nu$  in  $\text{cm}^{-1}$ ). Proton ( $^1\text{H}$ ), carbon-13 ( $^{13}\text{C}$ ) and fluorine-19 ( $^{19}\text{F}$ ) nuclear magnetic resonance (NMR) spectra were acquired using a Bruker DRX-500 Avance instrument. DMSO was utilized as the solvent, and tetramethylsilane (TMS) served as the internal standard. The spectrometer operated at frequencies of 500.1 MHz for  $^1\text{H}$  NMR, 125.7 MHz for  $^{13}\text{C}$  NMR and 471 MHz for  $^{19}\text{F}$  NMR. Chemical shifts ( $\delta$ ) were expressed in parts per million (ppm), and coupling constants ( $J$ ) were recorded in hertz (Hz). Mass spectrometry (MS) data were obtained using a Finnigan-MAT-8430 MS spectrometer, with an ionization potential of 70 electronvolts (eV). Elemental analyses for carbon (C), hydrogen (H), and nitrogen (N) content were carried out with a Heraeus CHN-O-Rapid analyzer. X-ray crystallography data were collected using a Marresearch 345 dtb diffractometer, which utilized Mo K $\alpha$  radiation (wavelength of 0.71073 Å). The measurements were performed at a temperature of 295 Kelvin (K). Analytical thin-layer chromatography (TLC) was conducted on silica gel plates with a UV-254 indicator, using appropriate eluents. Compounds were visualized under short-wavelength UV light.

## 2. General Procedure for Preparations of Isatylidene malononitriles

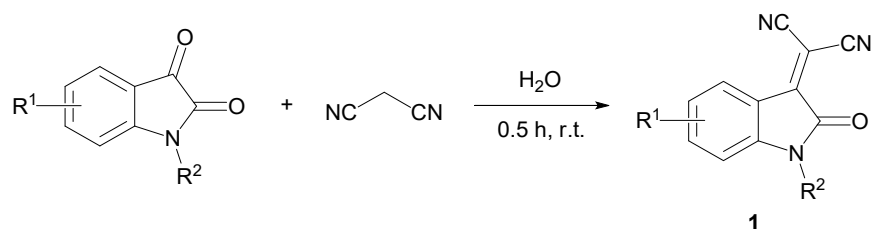

In a reaction vessel, 10.0 mmol of isatin (1.471 g) and 12.0 mmol of malononitrile (0.793 g, 1.2 equiv.) were added to 5 mL of water. After 0.5 hours at room temperature, the precipitated solid was collected by filtration and washed with water, affording the 2-(2-oxoindolin-3-ylidene)malononitrile as a red solid (up to a 97% yield). All the other isatylidene malononitrile derivatives were prepared according to the above-mentioned procedure, but with a reaction time of 1-2 hours.

### 3. General Procedure for the Synthesis of products 3 from 1 and 2

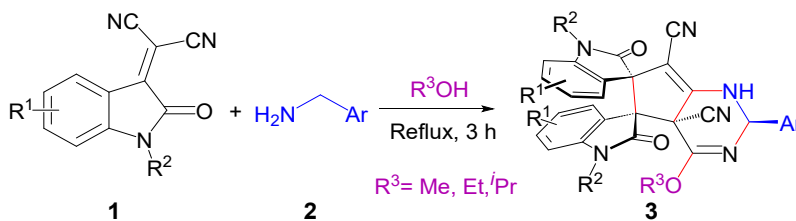

A mixture of **1** (2 mmol) and **2** (1 mmol) in  $R^3OH$  (3 mL) was refluxed in an oil bath for 3 hours. Centrifuging the precipitates, followed by recrystallization in a 50/50 solution of MeOH and DCM, and then washing the resulting crystals with cold ethanol yielded pure products.

### 4. Gram-Scale Reaction for the Synthesis of 3a

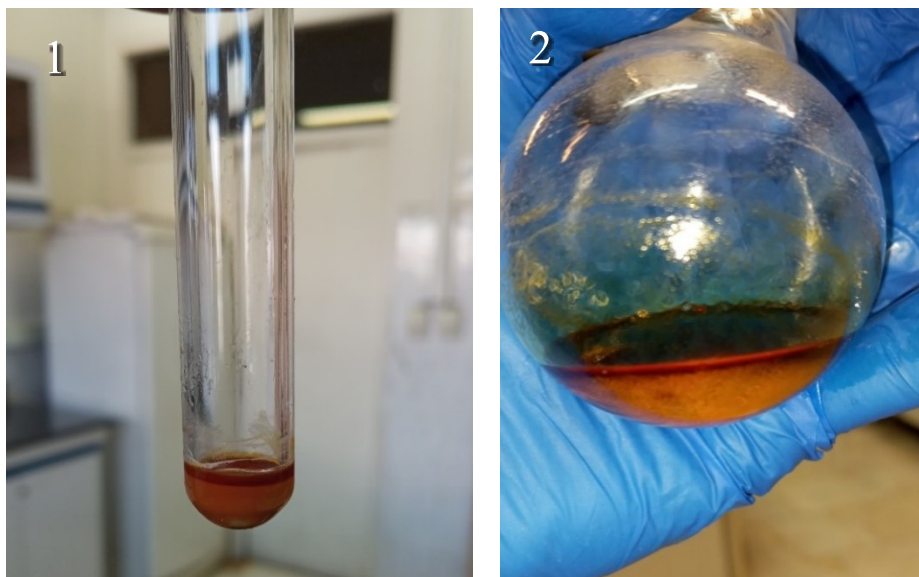

**Figure S1.** Reaction Setup.

**Figure S2.** Reaction Setup for Gram Scale.

To a dry round bottom flask equipped with a reflux condenser, was added isatylidene malononitrile **1a** (1.950 g, 10 mmol), benzylamine **2a** (0.536 g, 5 mmol) and 20 mL of methanol as solvent. The reaction mixture was then stirred at reflux temperature in an oil bath for 12 hours. Centrifuging the precipitates, followed by recrystallization in a 50/50 solution of MeOH and DCM, and then washing the resulting crystals with cold ethanol, will yield pure product **3a** (4.06 mmol, 2.08 g).

## 5. X-Ray Crystal Structure and Data of compound **3a**

Single crystals of compound **3a** (CCDC number 2358733) were grown by slow evaporation technique at ambient temperature. For preparation of a nearly saturated solution, 200 mg of **3a** was dissolved in 5 mL of MeCN:DCM (1:1) by warming to 60 °C. The solution was kept in a 25 mL beaker tightly covered with aluminum foil with few small holes for solvent evaporation. Colorless and transparent crystals obtained after 4 days. The data can be obtained free of charge from The Cambridge Crystallographic Data Centre via [www.ccdc.cam.ac.uk/getstructures](http://www.ccdc.cam.ac.uk/getstructures).

**Table S1.** Crystal data and structure refinement for **3a**. (CCDC: 2358733).

|                                             |                                                               |
|---------------------------------------------|---------------------------------------------------------------|
| Identification code                         | <b>3a</b>                                                     |
| Empirical formula                           | C <sub>30</sub> H <sub>20</sub> N <sub>6</sub> O <sub>3</sub> |
| Formula weight                              | 512/16                                                        |
| Temperature/K                               | 290                                                           |
| Crystal system                              | Monoclinic                                                    |
| Space group                                 | P 21/c                                                        |
| a/Å                                         | 11.230(2)                                                     |
| b/Å                                         | 14.496(3)                                                     |
| c/Å                                         | 17.861(4)                                                     |
| α/°                                         | 90                                                            |
| β/°                                         | 101.09(3)                                                     |
| γ/°                                         | 90                                                            |
| Volume/Å <sup>3</sup>                       | 2853.3(10)                                                    |
| Z                                           | 4                                                             |
| ρ <sub>calc</sub> /cm <sup>3</sup>          | 1.289                                                         |
| μ/mm <sup>-1</sup>                          | 0.09                                                          |
| F(000)                                      | 1152                                                          |
| Crystal size/mm <sup>3</sup>                | 0.3 × 0.25 × 0.1                                              |
| Radiation                                   | Mo Kα (λ = 0.71073 Å)                                         |
| Theta range for data collection/°           | 1.8 to 26.4                                                   |
| Index ranges                                | -14 ≤ h ≤ 14, -17 ≤ k ≤ 17, -22 ≤ l ≤ 22                      |
| Reflections collected                       | 20409                                                         |
| Independent reflection                      | 5642 [R <sub>int</sub> = 0.065]                               |
| Data/restraints/parameters                  | 5642 /0/381                                                   |
| Goodness-of-fit on F <sup>2</sup>           | 1.144                                                         |
| Final R indexes [I ≥ 2σ (I)]                | R <sub>1</sub> = 0.0810, wR <sub>2</sub> = 0.2040             |
| Final R indexes [all data]                  | R <sub>1</sub> = 0.0807, wR <sub>2</sub> = 0.2038             |
| Largest diff. peak/hole / e Å <sup>-3</sup> | 0.43/-0.24                                                    |

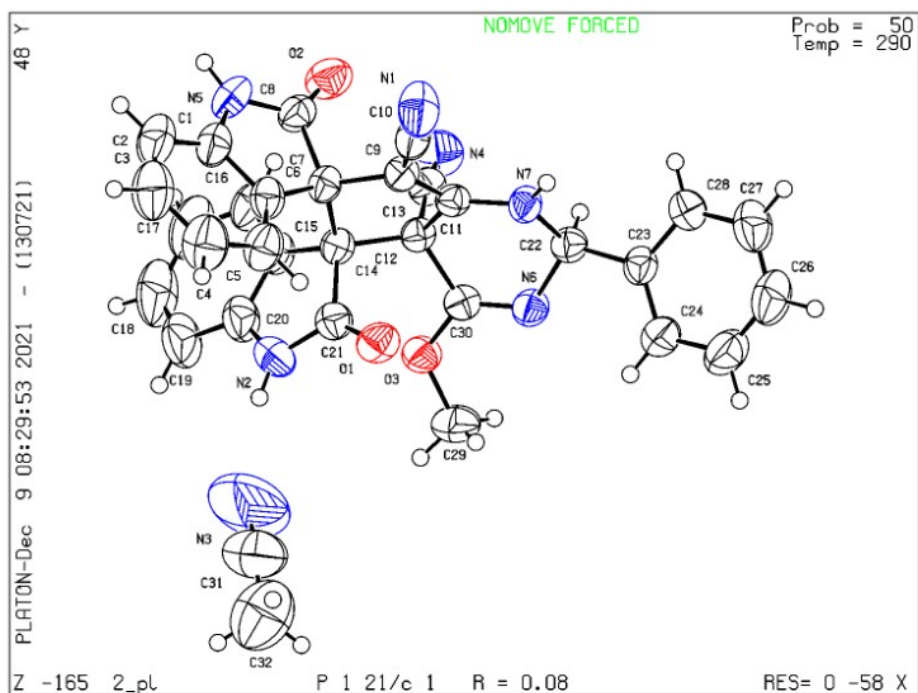

**Figure S3.** X-ray crystallographic analysis of **3a**.

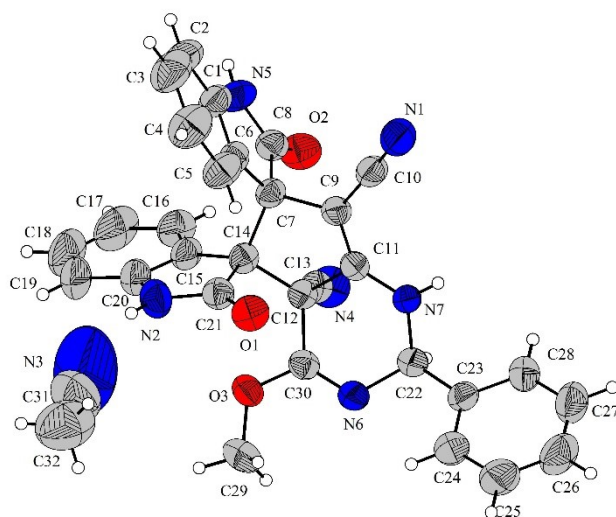

**Figure S4.** X-ray Crystal Structure (CCDC: 2358733) of Dispiro-bisoxindole Compound **3a** together with one Molecule of MeCN.

## 6. Characterization of Products

### 4'-Methoxy-2,2''-dioxo-2'-phenyl-1',2'-dihydro-4a'*H*-dispiro[indoline-3,5'-cyclopenta[*d*]pyrimidine-6',3''-indoline]-4a',7'-dicarbonitrile (3a)

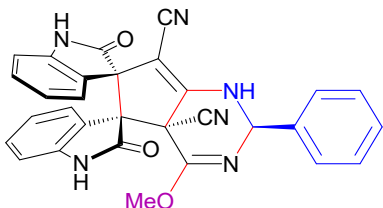

Colorless powder (235 mg from 1 mmol scale, 92% yield); mp: 270-275 °C (dec); IR (KBr,  $\text{cm}^{-1}$ ) 3428, 3244, 2194, 1708, 1670, 1642, 1619;  $^1\text{H}$  NMR (500 MHz,  $\text{DMSO-}d_6$ )  $\delta$  10.77 (s, 1H), 10.56 (s, 1H), 9.62 (s, 1H), 7.75 (d,  $J = 6.4$  Hz, 1H), 7.55 (td,  $J = 5.0, 2.3$  Hz, 2H), 7.50 (dd,  $J = 7.5, 2.3$  Hz, 2H), 7.46 – 7.43 (m, 1H), 7.29 (d,  $J = 7.2$  Hz, 1H), 7.24 (t,  $J = 7.5$  Hz, 1H), 6.95 (t,  $J = 6.5$  Hz, 1H), 7.02 (t,  $J = 6.9$  Hz, 1H), 6.95 (t,  $J = 6.5$  Hz, 1H), 6.70 (d,  $J = 8.0$  Hz, 1H), 6.62 (d,  $J = 7.1$  Hz, 1H), 6.18 (s, 1H), 3.50 (s, 3H);  $^{13}\text{C}\{^1\text{H}\}$  NMR (125 MHz,  $\text{DMSO-}d_6$ )  $\delta$  176.8, 174.3, 155.3, 153.2, 143.1, 142.9, 140.5, 130.3, 130.2, 128.7, 128.6, 127.6, 126.2, 125.7, 123.9, 122.6, 122.1, 121.9, 115.9, 113.7, 109.9, 109.8, 71.9, 71.6, 62.8, 58.6, 54.5, 46.7. MS:  $m/z$  (%): 512 (23), 485 (10), 428 (24), 380 (17), 351 (15), 262 (88), 234 (89), 205 (38), 132 (70), 104 (100), 77 (55). Anal. Calcd for  $\text{C}_{30}\text{H}_{20}\text{N}_6\text{O}_3$  (512.16) C, 70.30; H, 3.93; N, 16.40. Found: C, 70.67; H, 3.95; N, 16.48.

### 4'-Methoxy-2,2''-dioxo-2'-(*p*-tolyl)-1',2'-dihydro-4a'*H*-dispiro[indoline-3,5'-cyclopenta[*d*]pyrimidine-6',3''-indoline]-4a',7'-dicarbonitrile (3b)

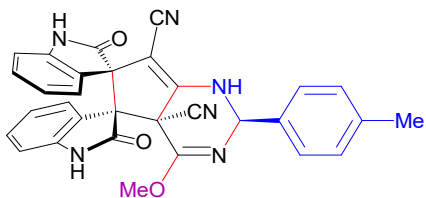

Colorless powder (244 mg from 1 mmol scale, 93% yield); mp: 277-278 °C (dec); IR (KBr,  $\text{cm}^{-1}$ ) 3449, 3289, 2211, 1729, 1703, 1686, 1648, 1617;  $^1\text{H}$  NMR (500 MHz,  $\text{DMSO-}d_6$ )  $\delta$  10.80 (s, 1H), 10.59 (s, 1H), 9.61 (s, 1H), 7.78 (d,  $J = 7.7$  Hz, 1H), 7.45 (d,  $J = 7.7$  Hz, 2H), 7.30 – 7.33 (m, 3H), 7.24 (t,  $J = 7.4$  Hz, 1H), 7.17 (t,  $J = 7.5$  Hz, 1H), 7.03 (t,  $J = 8.0$  Hz, 1H), 6.96 (t,  $J = 7.8$  Hz, 1H), 6.72 (d,  $J = 7.9$  Hz, 1H), 6.64 (d,  $J = 7.7$  Hz, 1H), 6.16 (s, 1H), 3.50 (s, 3H), 2.36 (s, 3H);  $^{13}\text{C}\{^1\text{H}\}$  NMR (125 MHz,  $\text{DMSO-}d_6$ )  $\delta$  176.9, 174.3, 155.3, 153.3, 143.1, 143.0, 138.1, 137.6, 130.3, 130.3, 129.1, 127.6, 126.3, 125.8, 124.0, 122.7, 122.1, 121.9, 116.0, 113.8, 109.9, 109.9, 71.8, 71.5, 62.9, 58.7, 54.5, 46.8, 20.9. MS:  $m/z$  (%): 525 (12), 499 (55), 442 (100), 394 (11), 365 (12), 262 (73), 234 (76), 205 (30), 132 (95), 118 (67), 89 (53). Anal. Calcd for  $\text{C}_{31}\text{H}_{22}\text{N}_6\text{O}_3$  (526.18) C, 70.71; H, 4.21; N, 15.96. Found: C, 71.16; H, 4.20; N, 16.07.

**4'-Methoxy-2'-(4-methoxyphenyl)-2,2''-dioxo-1',2'-dihydro-4a'*H*-dispiro[indoline-3,5'-cyclopenta[*d*]pyrimidine-6',3''-indoline]-4a',7'-dicarbonitrile (3c)**

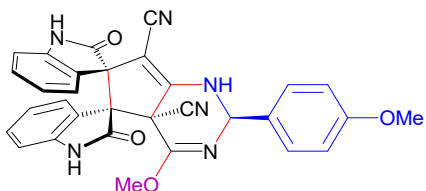

Yellow powder (209 mg from 1 mmol scale, 77% yield); mp: 266-267 °C (dec); IR (KBr,  $\text{cm}^{-1}$ ) 3425, 3355, 2210, 1727, 1688, 1643, 1618;  $^1\text{H}$  NMR (500 MHz,  $\text{DMSO-}d_6$ )  $\delta$  10.78 (s, 1H), 10.57 (s, 1H), 9.56 (s, 1H), 7.73 (d,  $J = 7.8$  Hz, 1H), 7.46 (d,  $J = 8.8$  Hz, 2H), 7.28 (d,  $J = 7.5$  Hz, 1H), 7.24 (t,  $J = 7.5$  Hz, 1H), 7.17 (t,  $J = 7.8$  Hz, 1H), 7.05 (d,  $J = 8.8$  Hz, 2H), 7.03 (t,  $J = 7.6$  Hz, 1H), 6.96 (t,  $J = 7.7$  Hz, 1H), 6.70 (d,  $J = 7.8$  Hz, 1H), 6.61 (d,  $J = 7.8$  Hz, 1H), 6.13 (s, 1H), 3.81 (s, 3H), 3.49 (s, 3H);  $^{13}\text{C}\{^1\text{H}\}$  NMR (125 MHz,  $\text{DMSO-}d_6$ )  $\delta$  176.7, 174.2, 159.5, 155.1, 153.2, 143.0, 142.9, 132.6, 132.6, 130.2, 130.1, 128.8, 126.2, 125.7, 123.9, 122.6, 122.0, 121.8, 115.9, 113.8, 109.8, 109.7, 71.5, 71.1, 62.7, 58.5, 55.3, 54.4, 46.6. MS:  $m/z$  (%): 542 (50), 515 (20), 458 (14), 410 (40), 393 (22), 346 (21), 288 (100), 273 (30), 196 (20), 149 (75), 134 (23), 119 (24), 92 (36), 77 (75). Anal. Calcd for  $\text{C}_{31}\text{H}_{22}\text{N}_6\text{O}_4$  (542.17) C, 68.63; H, 4.09; N, 15.49. Found: C, 69.07; H, 4.14; N, 15.54.

**(2,4-Dimethoxyphenyl)-4'-methoxy-2,2''-dioxo-1',2'-dihydro-4a'*H*-dispiro[indoline-3,5'-cyclopenta[*d*]pyrimidine-6',3''-indoline]-4a',7'-dicarbonitrile (3d)**

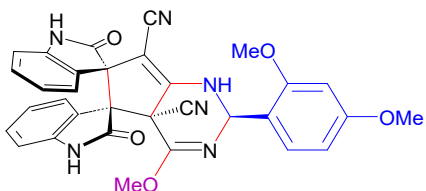

Yellow powder (261 mg from 1 mmol scale, 91% yield); mp: 234-236 °C (dec); IR (KBr,  $\text{cm}^{-1}$ ) 3369, 3228, 2198, 1713, 1681, 1641, 1617;  $^1\text{H}$  NMR (500 MHz,  $\text{DMSO-}d_6$ )  $\delta$  10.73 (s, 1H), 10.52 (s, 1H), 9.44 (s, 1H), 7.72 (dd,  $J = 7.8, 1.2$  Hz, 1H), 7.32 – 7.30 (m, 1H), 7.26 (dd,  $J = 7.8, 1.2$  Hz, 1H), 7.22 (td,  $J = 7.8, 1.4$  Hz, 1H), 7.15 (td,  $J = 7.6, 1.3$  Hz, 1H), 7.01 (td,  $J = 7.8, 1.2$  Hz, 1H), 6.93 (td,  $J = 7.6, 1.1$  Hz, 1H), 6.70 – 6.64 (m, 3H), 6.60 (d,  $J = 7.8$  Hz, 1H), 6.31 (s, 1H), 3.88 (s, 3H), 3.81 (s, 3H), 3.52 (s, 3H);  $^{13}\text{C}\{^1\text{H}\}$  NMR (125 MHz,  $\text{DMSO-}d_6$ )  $\delta$  176.8, 174.1, 160.9, 157.6, 156.2, 153.4, 142.9, 142.8, 130.1, 130.0, 129.0, 126.1, 125.6, 123.9, 122.5, 121.9, 121.7, 119.8, 115.9, 113.3, 109.7, 109.6, 105.4, 98.0, 70.6, 64.9, 62.9, 58.6, 55.7, 55.4, 54.4, 47.0. MS:  $m/z$  (%): 571 (22), 545 (49), 488 (10), 262 (65), 234 (71), 205 (36), 164 (100), 134 (30), 92 (33), 77 (55). Anal. Calcd for  $\text{C}_{32}\text{H}_{24}\text{N}_6\text{O}_5$  (572.18) C, 67.13; H, 4.23; N, 14.68. Found: C, 67.48; H, 4.27; N, 14.74.

**2'-(4-Chlorophenyl)-4'-methoxy-2,2''-dioxo-1',2'-dihydro-4a'H-dispiro[indoline-3,5'-cyclopenta[d]pyrimidine-6',3''-indoline]-4a',7'-dicarbonitrile (3e)**

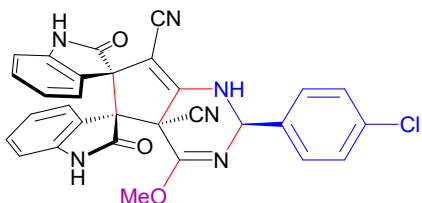

Colorless powder (239 mg from 1 mmol scale, 88% yield); mp: 265-267 °C (dec); IR (KBr,  $\text{cm}^{-1}$ ) 3287, 3203, 2210, 1730, 1704, 1687, 1648, 1618;  $^1\text{H}$  NMR (500 MHz,  $\text{DMSO-}d_6$ )  $\delta$  10.78 (s, 1H), 10.57 (s, 1H), 9.61 (s, 1H), 7.76 (d,  $J = 7.7$  Hz, 1H), 7.58 (s, 4H), 7.30 (d,  $J = 7.7$  Hz,

1H), 7.24 (t,  $J = 7.8$  Hz, 1H), 7.17 (t,  $J = 7.7$  Hz, 1H), 7.03 (t,  $J = 7.7$  Hz, 1H), 6.96 (t,  $J = 7.6$  Hz, 1H), 6.71 (d,  $J = 7.8$  Hz, 1H), 6.63 (d,  $J = 7.8$  Hz, 1H), 6.24 (s, 1H), 3.51 (s, 3H);  $^{13}\text{C}\{^1\text{H}\}$  NMR (125 MHz,  $\text{DMSO-}d_6$ )  $\delta$  176.7, 174.2, 155.6, 153.2, 143.0, 142.9, 139.3, 133.3, 130.3, 130.2, 129.5, 128.6, 126.2, 125.7, 123.9, 122.5, 122.1, 121.8, 115.8, 113.6, 109.9, 109.8, 72.1, 70.8, 62.8, 58.7, 54.6, 46.7. MS:  $m/z$  (%): 549 (2), 534 (12), 519 (24), 462 (24), 262 (98), 234 (100), 205 (41), 154 (92), 137 (98). Anal. Calcd for  $\text{C}_{30}\text{H}_{19}\text{ClN}_6\text{O}_3$  (546.12) C, 65.88; H, 3.50; N, 15.36. Found: C, 66.27; H, 3.54; N, 15.42.

**2'-(4-Fluorophenyl)-4'-methoxy-2,2''-dioxo-1',2'-dihydro-4a'H-dispiro[indoline-3,5'-cyclopenta[d]pyrimidine-6',3''-indoline]-4a',7'-dicarbonitrile (3f)**

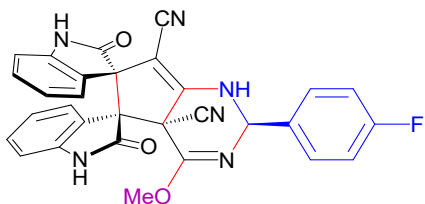

Colorless powder (238 mg from 1 mmol scale, 90% yield); mp: 267-270 °C (dec); IR (KBr,  $\text{cm}^{-1}$ ) 3291, 3199, 2213, 1730, 1706, 1686, 1649, 1618;  $^1\text{H}$  NMR (500 MHz,  $\text{DMSO-}d_6$ )  $\delta$  10.79 (s, 1H), 10.57 (s, 1H), 9.60 (s, 1H), 7.75 (d,  $J = 6.9$  Hz, 1H), 7.59 (dd,  $J = 8.7, 5.7$ , 2H), 7.33

(t,  $J = 8.8$ , 2H), 7.29 (d,  $J = 6.8$  Hz, 1H), 7.24 (t,  $J = 7.7$  Hz, 1H), 7.16 (t,  $J = 7.6$  Hz, 1H), 7.03 (t,  $J = 7.5$  Hz, 1H), 6.95 (t,  $J = 7.7$  Hz, 1H), 6.70 (d,  $J = 7.9$  Hz, 1H), 6.62 (d,  $J = 7.7$  Hz, 1H), 6.23 (s, 1H), 3.50 (s, 3H);  $^{13}\text{C}\{^1\text{H}\}$  NMR (125 MHz,  $\text{DMSO-}d_6$ )  $\delta$  176.7, 174.3, 162.3 (d,  $J = 243.2$  Hz), 155.5, 153.2, 143.1, 142.9, 136.8 (d,  $J = 3.0$  Hz), 130.3, 130.2, 129.8 (d,  $J = 8.6$  Hz), 126.2, 125.7, 123.9, 122.6, 122.1, 121.9, 115.9, 115.4 (d,  $J = 21.4$  Hz), 113.6, 109.9, 109.8, 72.0, 70.8, 62.8, 58.7, 54.6, 46.7;  $^{19}\text{F}$  NMR (471 MHz,  $\text{DMSO-}d_6$ )  $\delta$  -113.5. MS:  $m/z$  (%): 530 (25), 503 (50), 446 (83), 407 (23), 262 (100), 234 (78), 141 (51), 122 (41). Anal. Calcd for  $\text{C}_{30}\text{H}_{19}\text{FN}_6\text{O}_3$  (530.15) C, 67.92; H, 3.61; N, 15.84. Found: C, 68.41; H, 3.66; N, 15.91.

**4'-Methoxy-2,2''-dioxo-2'-(4-(trifluoromethyl)phenyl)-1',2'-dihydro-4a'H-dispiro[indoline-3,5'-cyclopenta[d]pyrimidine-6',3''-indoline]-4a',7'-dicarbonitrile (3g)**



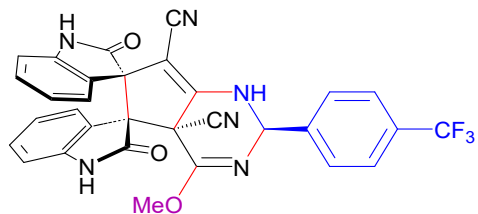

Colorless powder (217 mg from 1 mmol scale, 75% yield); mp: 242-244 °C (dec); IR (KBr,  $\text{cm}^{-1}$ ) 3408, 3198, 2215, 1717, 1685, 1649, 1620;  $^1\text{H}$  NMR (500 MHz,  $\text{DMSO-}d_6$ )  $\delta$  10.79 (s, 1H), 10.58 (s, 1H), 9.61 (s, 1H), 7.80 – 7.77 (m, 2H), 7.75 (d,  $J = 7.6$  Hz, 1H), 7.53 – 7.51 (m, 2H), 7.29 (d,  $J = 7.6$  Hz, 1H), 7.24 (t,  $J = 7.6$  Hz, 1H), 7.17 (t,  $J = 7.7$  Hz, 1H), 7.03 (t,  $J = 7.7$  Hz, 1H), 6.96 (t,  $J = 7.6$  Hz, 1H), 6.70 (d,  $J = 7.9$  Hz, 1H), 6.62 (d,  $J = 7.7$  Hz, 1H), 6.23 (s, 1H), 3.50 (s, 3H);  $^{13}\text{C}\{^1\text{H}\}$  NMR (125 MHz,  $\text{DMSO-}d_6$ )  $\delta$  176.8, 174.5, 156.6, 153.4, 143.0, 142.9, 142.8, 130.0, 129.9, 129.6, 126.2, 125.7, 124.2, 123.9, 123.9, 123.0, 122.0, 121.9, 121.7, 115.7, 113.8, 109.7, 109.6, 72.3, 71.9, 62.5, 57.4, 54.1, 46.8;  $^{19}\text{F}$  NMR (471 MHz,  $\text{DMSO-}d_6$ )  $\delta$  -60.9. MS:  $m/z$  (%): 579 (9), 552 (13), 495 (20), 262 (100), 234 (65), 205 (28), 172 (81), 156 (12), 149 (21). Anal. Calcd for  $\text{C}_{31}\text{H}_{19}\text{F}_3\text{N}_6\text{O}_3$  (580.15) C, 64.14; H, 9.82; N, 14.48. Found: C, 64.59; H, 3.32; N, 14.52.

**2'-(2-Chlorophenyl)-4'-methoxy-2,2''-dioxo-1',2'-dihydro-4a'H-dispiro[indoline-3,5'-cyclopenta[d]pyrimidine-6',3''-indoline]-4a',7'-dicarbonitrile (3h)**

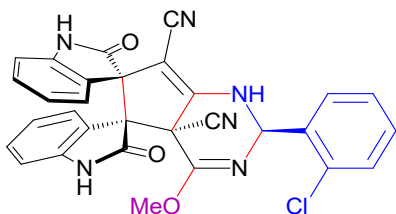

Yellow powder (193 mg from 1 mmol scale, 71% yield); mp: 250-252 °C (dec); IR (KBr,  $\text{cm}^{-1}$ ) 3332, 3205, 3065, 2212, 1721, 1685, 1652, 1620;  $^1\text{H}$  NMR (500 MHz,  $\text{DMSO-}d_6$ )  $\delta$  10.80 (s, 1H), 10.60 (s, 1H), 9.80 (s, 1H), 7.75 (d,  $J = 7.8$  Hz, 1H), 7.59 (dd,  $J = 7.5, 1.9$  Hz, 1H), 7.56 (d,  $J = 6.7$  Hz, 1H), 7.52 (t,  $J = 7.3$  Hz, 1H), 7.48 (td,  $J = 7.5, 1.9$  Hz, 1H), 7.29 (d,  $J = 7.8$  Hz, 1H), 7.25 (t,  $J = 7.9$  Hz, 1H), 7.17 (t,  $J = 7.7$  Hz, 1H), 7.03 (t,  $J = 7.4$  Hz, 1H), 6.96 (t,  $J = 7.7$  Hz, 1H), 6.71 (d,  $J = 7.7$  Hz, 1H), 6.63 (d,  $J = 8.1$  Hz, 1H), 6.44 (s, 1H), 3.55 (s, 3H);  $^{13}\text{C}\{^1\text{H}\}$  NMR (125 MHz,  $\text{DMSO-}d_6$ )  $\delta$  176.7, 174.2, 156.7, 153.3, 143.0, 142.9, 141.9, 134.2, 130.6, 130.5, 130.3, 129.8, 129.4, 127.8, 126.2, 125.7, 123.8, 122.4, 122.1, 122.0, 116.3, 113.3, 109.9, 109.8, 73.7, 71.9, 62.9, 58.7, 54.7, 47.1. MS:  $m/z$  (%): 546 (3), 519 (16), 425 (12), 360 (41), 297 (20), 235 (25), 170 (43), 133 (42), 89 (76), 66 (100). Anal. Calcd for  $\text{C}_{30}\text{H}_{19}\text{ClN}_6\text{O}_3$  (546.12) C, 65.88; H, 3.50; N, 15.36. Found: C, 65.57; H, 3.56; N, 15.44.

**5,5''-Dichloro-4'-methoxy-2,2''-dioxo-2'-phenyl-1',2'-dihydro-4a'H-dispiro[indoline-3,5'-cyclopenta[d]pyrimidine-6',3''-indoline]-4a',7'-dicarbonitrile (3i)**

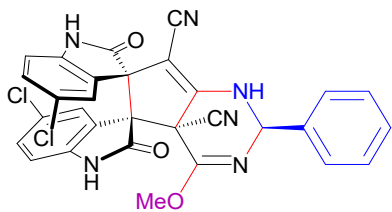

Colorless powder (262 mg from 1 mmol scale, 90% yield); mp: 275-277 °C (dec); IR (KBr,  $\text{cm}^{-1}$ ) 3427, 3244, 2209, 1719, 1674, 1643, 1620;  $^1\text{H}$  NMR (500 MHz,  $\text{DMSO-}d_6$ )  $\delta$  11.20 (s, 1H), 10.96 (s, 1H), 9.85 (s, 1H), 7.72 (d,  $J = 2.4$  Hz, 1H), 7.52 (t,  $J = 6.5$  Hz, 2H), 7.51 – 7.47 (m, 2H),

7.45 (td,  $J = 6.4, 1.7$  Hz, 1H), 7.36 (dd,  $J = 8.4, 2.2$  Hz, 1H), 7.28 (dd,  $J = 8.4, 2.2$  Hz, 1H), 7.24 (d,  $J = 2.2$  Hz, 1H), 6.80 (dd,  $J = 8.4, 4.3$  Hz, 1H), 6.72 (dd,  $J = 8.3, 4.2$  Hz, 1H), 6.22 (s, 1H), 3.52 (s, 3H);  $^{13}\text{C}\{^1\text{H}\}$  NMR (125 MHz,  $\text{DMSO-}d_6$ )  $\delta$  176.3, 173.8, 154.6, 153.1, 141.9, 141.8, 140.1, 130.5, 130.5, 128.8, 128.6, 127.6, 126.2, 126.0, 126.0, 125.7, 125.6, 124.2, 115.5, 113.3, 111.7, 111.6, 71.7, 70.6, 62.8, 58.2, 54.7, 46.5. MS:  $m/z$  (%): 542 (100), 518 (12), 496 (51), 410 (37), 393 (22), 338 (20), 304 (30), 288 (60), 273 (49), 250 (11), 219 (75), 167 (13), 149 (35), 132 (13), 104 (33), 84 (65), 66 (90). Anal. Calcd for  $\text{C}_{30}\text{H}_{18}\text{Cl}_2\text{N}_6\text{O}_3$  (580.08) C, 61.97; H, 3.12; N, 14.45. Found: C, 62.47; H, 3.17; N, 14.52.

**5,5''-Dichloro-4'-methoxy-2,2''-dioxo-2'-(*p*-tolyl)-1',2'-dihydro-4a'*H*-dispiro[indoline-3,5'-cyclopenta[*d*]pyrimidine-6',3''-indoline]-4a',7'-dicarbonitrile (3j)**

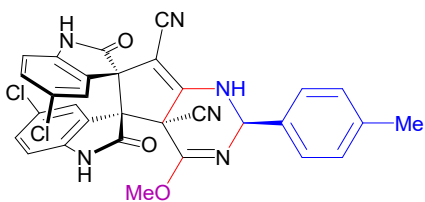

Colorless powder (270 mg from 1 mmol scale, 91% yield); mp: 269-272 °C (dec); IR (KBr,  $\text{cm}^{-1}$ ) 3441, 3290, 2215, 1720, 1672, 1640, 1625;  $^1\text{H}$  NMR (500 MHz,  $\text{DMSO-}d_6$ )  $\delta$  11.18 (s, 1H), 10.95 (s, 1H), 9.79 (s, 1H), 7.71 (d,  $J = 2.4$  Hz, 1H), 7.40 (d,  $J = 7.9$  Hz, 2H), 7.36 (dd,  $J = 8.4, 2.4$  Hz, 1H), 7.30 (d,  $J = 7.7$  Hz, 2H), 7.28 (dd,  $J = 8.5, 2.5$  Hz, 1H), 7.23 (d,  $J = 2.4$  Hz, 1H), 6.80 (dd,  $J = 8.1, 4.2$  Hz, 1H), 6.71 (dd,  $J = 8.0, 4.0$  Hz, 1H), 6.16 (s, 1H), 3.51 (s, 3H), 2.36 (s, 3H);  $^{13}\text{C}\{^1\text{H}\}$  NMR (125 MHz,  $\text{DMSO-}d_6$ )  $\delta$  176.3, 173.7, 154.6, 153.1, 141.9, 141.8, 138.1, 137.2, 130.5, 130.4, 129.1, 127.4, 126.2, 126.0, 125.9, 125.7, 125.7, 124.2, 115.5, 113.3, 111.6, 111.6, 71.5, 70.5, 62.8, 58.2, 54.6, 46.5, 20.9. MS:  $m/z$  (%): 542 (26), 526 (3), 510 (6), 485(2), 427 (6), 410 (11), 392 (3), 365 (6), 346 (8), 330 (4), 304 (3), 288 (13), 264 (26), 235 (2), 167 (12), 138 (11), 116 (16), 84 (67), 66 (100). Anal. Calcd for  $\text{C}_{31}\text{H}_{20}\text{Cl}_2\text{N}_6\text{O}_3$  (594.10) C, 62.53; H, 3.39; N, 14.11. Found: C, 62.97; H, 3.44; N, 14.16.

**7,7''-Dichloro-2'-(4-fluorophenyl)-4'-methoxy-2,2''-dioxo-1',2'-dihydro-4a'*H*-dispiro[indoline-3,5'-cyclopenta[*d*]pyrimidine-6',3''-indoline]-4a',7'-dicarbonitrile (3k)**

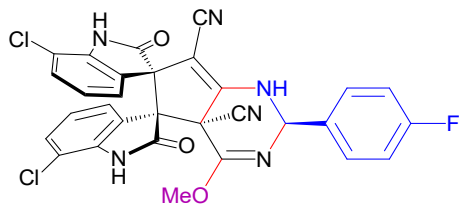

Colorless powder (265 mg from 1 mmol scale, 89% yield); mp: 255-258 °C (dec); IR (KBr,  $\text{cm}^{-1}$ ) 3425, 3289, 3222, 1733, 1720, 1686, 1648, 1618;  $^1\text{H}$  NMR (500 MHz,  $\text{DMSO-}d_6$ )  $\delta$  11.38 (s, 1H), 11.15 (s, 1H), 9.79 (s, 1H), 7.68 (d,  $J = 7.7$  Hz, 1H), 7.58 (dd,  $J = 8.4, 5.3$  Hz, 2H), 7.39 (d,  $J = 8.0$  Hz, 1H), 7.34 (t,  $J = 8.7$  Hz, 2H), 7.31 (d,  $J = 8.4$  Hz, 1H), 7.23 (d,  $J = 7.7$  Hz, 1H), 7.11 (t,  $J = 8.0$  Hz, 1H), 7.03 (t,  $J = 7.9$  Hz, 1H), 6.26 (s, 1H), 3.52 (s, 3H);  $^{13}\text{C}\{^1\text{H}\}$  NMR (125 MHz,  $\text{DMSO-}d_6$ )  $\delta$  176.5, 173.9, 162.30 (d,  $J = 245.9$  Hz), 154.9, 153.0, 140.8, 140.7, 136.4, 130.7, 130.5, 129.7 (d,  $J = 7.5$  Hz), 125.3, 124.8, 124.2, 123.9, 123.5, 123.3, 115.4 (d,  $J = 22.0$  Hz), 115.2, 114.1, 114.0, 113.2, 71.1, 70.8, 63.4, 59.1, 54.7, 46.6;  $^{19}\text{F}$  NMR (471 MHz,  $\text{DMSO-}d_6$ )  $\delta$  -113.3. MS:  $m/z$  (%): 541 (43), 517 (45), 477 (71), 462 (14), 435 (57), 407 (22), 391 (16), 368 (27), 339 (21), 302 (17), 268 (31), 230 (27), 203 (15), 176 (28), 150 (44), 123 (41), 84 (64), 66 (100). Anal. Calcd for  $\text{C}_{30}\text{H}_{17}\text{Cl}_2\text{FN}_6\text{O}_3$  (598.07) C, 60.11; H, 2.86; N, 14.02. Found: C, 60.57; H, 2.84; N, 14.06.

**7,7''-Dichloro-2'-(4-chlorophenyl)-4'-methoxy-2,2''-dioxo-1',2'-dihydro-4a'H-dispiro [indoline-3,5'-cyclopenta[d]pyrimidine-6',3''-indoline]-4a',7'-dicarbonitrile (3l)**

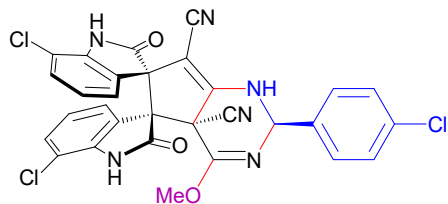

Colorless powder (265 mg from 1 mmol scale, 86% yield); mp: 266-267 °C (dec); IR (KBr,  $\text{cm}^{-1}$ ) 3432, 3291, 3240, 2208, 1741, 1719, 1691, 1648, 1618;  $^1\text{H}$  NMR (500 MHz,  $\text{DMSO-}d_6$ )  $\delta$  11.36 (s, 1H), 11.13 (s, 1H), 9.78 (s, 1H), 7.69 (d,  $J = 7.6$  Hz, 1H), 7.58 (d,  $J = 7.5$  Hz, 2H), 7.56 (d,  $J = 7.4$  Hz, 2H), 7.38 (d,  $J = 7.6$  Hz, 1H), 7.30 (d,  $J = 8.0$  Hz, 1H), 7.23 (d,  $J = 8.0$  Hz, 1H), 7.11 (t,  $J = 7.8$  Hz, 1H), 7.02 (t,  $J = 7.4$  Hz, 1H), 6.26 (s, 1H), 3.53 (s, 3H);  $^{13}\text{C}\{^1\text{H}\}$  NMR (125 MHz,  $\text{DMSO-}d_6$ )  $\delta$  176.5, 173.9, 155.1, 153.1, 140.7, 140.7, 139.0, 133.4, 130.7, 130.6, 129.5, 128.6, 125.4, 124.8, 124.3, 123.9, 123.6, 123.4, 115.4, 114.1, 114.0, 113.2, 71.3, 70.8, 63.4, 59.1, 54.8, 46.6. MS:  $m/z$  (%): 548 (2), 532 (11), 476 (3), 449 (7), 419 (8), 347 (7), 330 (28), 302 (30), 284 (32), 257 (10), 239 (11), 203 (12), 166 (22), 138 (27), 119 (11), 102 (22), 84 (61), 66 (100). Anal. Calcd for  $\text{C}_{30}\text{H}_{17}\text{Cl}_3\text{N}_6\text{O}_3$  (614.04) C, 58.51; H, 2.78; N, 13.65. Found: C, 58.96; H, 2.79; N, 13.70.

**5,5''-Dibromo-4'-methoxy-2,2''-dioxo-2'-phenyl-1',2'-dihydro-4a'H-dispiro[indoline-3,5'-cyclopenta[d]pyrimidine-6',3''-indoline]-4a',7'-dicarbonitrile (3m)**

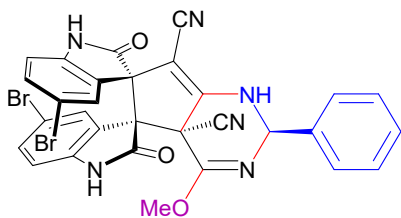

Colorless powder (283 mg from 1 mmol scale, 85% yield); mp: 265-266 °C (dec); IR (KBr,  $\text{cm}^{-1}$ ) 3425, 3374, 2211, 1719, 1684, 1643, 1617;  $^1\text{H}$  NMR (500 MHz,  $\text{DMSO-}d_6$ )  $\delta$  11.19 (s, 1H), 10.95 (s, 1H), 9.83 (s, 1H), 7.84 (d,  $J = 2.2$  Hz, 1H), 7.53 – 7.50 (m, 4H), 7.48 (dd,  $J = 8.2, 2.2$  Hz, 1H), 7.45 (t,  $J = 6.6$  Hz, 1H), 7.41 (dd,  $J = 8.3, 2.1$  Hz, 1H), 7.36 (d,  $J = 2.2$  Hz, 1H), 6.76 (d,  $J = 8.4$  Hz, 1H), 6.67 (d,  $J = 8.2$  Hz, 1H), 6.22 (s, 1H), 3.52 (s, 3H);  $^{13}\text{C}\{^1\text{H}\}$  NMR (125 MHz,  $\text{DMSO-}d_6$ )  $\delta$  176.2, 173.6, 154.6, 153.1, 142.3, 142.2, 140.1, 133.3, 133.2, 128.7, 128.7, 128.6, 128.4, 127.5, 126.0, 124.5, 115.5, 113.8, 113.7, 113.2, 112.1, 112.1, 71.6, 70.6, 62.7, 58.1, 54.6, 46.5. MS:  $m/z$  (%): 542 (5), 518(3), 419 (4), 301 (5), 273 (6), 250 (2), 172 (3), 147 (47), 119 (100), 92 (88), 66 (29). Anal. Calcd for  $\text{C}_{30}\text{H}_{18}\text{Br}_2\text{N}_6\text{O}_3$  (667.98) C, 53.75; H, 2.71; N, 12.54. Found: C, 59.27; H, 2.79; N, 12.50.

**5,5''-Dibromo-4'-methoxy-2,2''-dioxo-2'-(*p*-tolyl)-1',2'-dihydro-4a'*H*-dispiro[indoline-3,5'-cyclopenta[*d*]pyrimidine-6',3''-indoline]-4a',7'-dicarbonitrile (3n)**

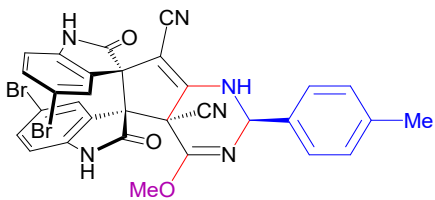

Colorless powder (293 mg from 1 mmol scale, 86% yield); mp: 260-262 °C (dec); IR (KBr,  $\text{cm}^{-1}$ ) 3316, 3231, 2216, 1726, 1686, 1644, 1617;  $^1\text{H}$  NMR (500 MHz,  $\text{DMSO-}d_6$ )  $\delta$  11.18 (s, 1H), 10.94 (s, 1H), 9.77 (s, 1H), 7.83 (d,  $J = 2.2$  Hz, 1H), 7.48 (dd,  $J = 8.3, 2.1$  Hz, 1H), 7.42 – 7.39 (m, 3H), 7.35 (d,  $J = 2.1$  Hz, 1H), 7.31 (d,  $J = 8.1$  Hz, 2H), 6.75 (d,  $J = 8.4$  Hz, 1H), 6.66 (d,  $J = 8.4$  Hz, 1H), 6.16 (s, 1H), 3.51 (s, 3H), 2.37 (s, 3H);  $^{13}\text{C}\{^1\text{H}\}$  NMR (125 MHz,  $\text{DMSO-}d_6$ )  $\delta$  176.2, 173.6, 154.6, 153.1, 142.3, 142.2, 138.1, 137.2, 133.3, 133.3, 129.0, 128.7, 128.4, 127.4, 126.0, 124.5, 115.5, 113.8, 113.6, 113.2, 112.1, 112.0, 71.5, 70.5, 62.7, 58.1, 54.6, 46.5, 20.9. MS:  $m/z$  (%): 544 (2), 489 (6), 473 (7), 443 (8), 420 (19), 392 (9), 264 (44), 211 (31), 181 (23), 132 (25), 116 (58), 91 (100), 66 (35). Anal. Calcd for  $\text{C}_{31}\text{H}_{20}\text{Br}_2\text{N}_6\text{O}_3$  (682.00) C, 54.41; H, 2.95; N, 12.28. Found: C, 54.86; H, 3.02; N, 12.35.

**1,1''-Dibenzyl-4'-methoxy-2,2''-dioxo-2'-phenyl-1',2'-dihydro-4a'*H*-dispiro[indoline-3,5'-cyclopenta[*d*]pyrimidine-6',3''-indoline]-4a',7'-dicarbonitrile (3o)**

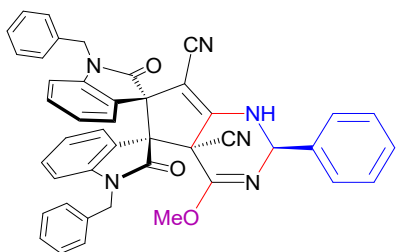

Colorless powder (312 mg from 1 mmol scale, 90% yield); mp: 251-253 °C (dec); IR (KBr,  $\text{cm}^{-1}$ ) 3422, 3283, 2213, 1718, 1678, 1643, 1610;  $^1\text{H}$  NMR (500 MHz,  $\text{DMSO-}d_6$ )  $\delta$  9.88 (s, 1H), 7.81 (d,  $J = 7.7$  Hz, 1H), 7.58 (d,  $J = 7.3$  Hz, 2H), 7.52 (t,  $J = 7.6$  Hz, 2H), 7.45 (t,  $J = 7.4$  Hz, 1H),

7.33 – 7.28 (m, 2H), 7.26 – 7.19 (m, 7H), 7.07 – 7.04 (m, 2H), 7.02 – 6.98 (m, 3H), 6.93 (t,  $J = 7.6$  Hz, 1H), 6.81 (d,  $J = 8.0$  Hz, 1H), 6.68 (d,  $J = 8.0$  Hz, 1H), 6.26 (s, 1H), 4.84 – 4.72 (m, 2H), 3.40 (s, 3H);  $^{13}\text{C}\{^1\text{H}\}$  NMR (125 MHz,  $\text{DMSO-}d_6$ )  $\delta$  175.2, 172.5, 154.7, 153.3, 143.5, 143.4, 140.3, 135.3, 130.4, 130.3, 128.7, 128.6, 128.6, 128.5, 127.6, 127.5, 127.4, 127.4, 127.0, 126.0, 125.6, 123.1, 123.0, 122.9, 121.7, 115.6, 113.6, 109.9, 109.7, 71.7, 71.6, 62.6, 58.3, 54.7, 46.7, 43.3, 43.0. MS:  $m/z$  (%): 533 (2), 469 (10), 442 (25), 414 (10), 385 (3), 323 (10), 306 (8), 250 (11), 223 (10), 204 (3), 118 (5), 91 (15), 91 (100), 65 (15). Anal. Calcd for  $\text{C}_{44}\text{H}_{32}\text{N}_6\text{O}_3$  (692.25) C, 76.28; H, 4.66; N, 12.13. Found: C, 76.87; H, 4.71; N, 12.20.

**4'-Ethoxy-2,2''-dioxo-2'-phenyl-1',2'-dihydro-4a'*H*-dispiro[indoline-3,5'-cyclopenta[*d*]pyrimidine-6',3''-indoline]-4a',7'-dicarbonitrile (3p).**

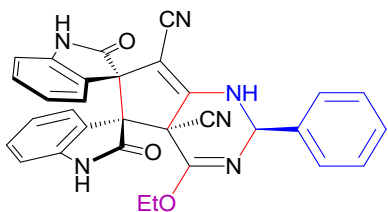

Colorless powder (206 mg from 1 mmol scale, 78% yield); mp: 251-253 °C (dec); IR (KBr,  $\text{cm}^{-1}$ ) 3380, 3196, 3085, 2255, 2207, 1727 1645, 1618;  $^1\text{H}$  NMR (500 MHz,  $\text{DMSO-}d_6$ )  $\delta$  10.77 (s, 1H), 10.56 (s, 1H), 9.60 (s, 1H), 7.74 (d,  $J = 7.8$  Hz, 1H), 7.54 (dd,  $J = 8.4, 1.4$  Hz, 2H),

7.49 (td,  $J = 6.7, 1.9$  Hz, 2H), 7.45 – 7.40 (m, 1H), 7.30 (d,  $J = 7.7$  Hz, 1H), 7.24 (t,  $J = 7.7$  Hz, 1H), 7.17 (t,  $J = 7.7$  Hz, 1H), 7.02 (t,  $J = 7.7$  Hz, 1H), 6.95 (t,  $J = 7.6$  Hz, 1H), 6.70 (d,  $J = 7.7$  Hz, 1H), 6.62 (d,  $J = 7.5$  Hz, 1H), 6.15 (s, 1H), 3.94 [(AB) $X_3$  system,  $\Delta\nu_{\text{AB}} = 70.8$  Hz,  $^2J_{\text{AX}} = ^2J_{\text{BX}} = 7.0$  Hz,  $\text{CH}_2$ ], 0.97 (t,  $J = 7.0$  Hz, 3H);  $^{13}\text{C}\{^1\text{H}\}$  NMR (125 MHz,  $\text{DMSO-}d_6$ )  $\delta$  176.7, 174.0, 154.6, 153.2, 143.0, 142.9, 140.4, 130.0, 130.0, 128.5, 128.4, 127.5, 126.2, 125.6, 124.0, 122.6, 121.9, 121.7, 115.8, 113.7, 109.6, 109.5, 71.7, 71.5, 63.2, 62.6, 58.6, 46.4, 18.5. MS:  $m/z$  (%): 527 (8), 500 (7), 428 (8), 339 (9), 296 (7), 262 (16), 236 (8), 219 (64), 190 (6), 165 (16), 141 (15), 116 (32), 84 (71), 66 (100). Anal. Calcd for  $\text{C}_{31}\text{H}_{22}\text{N}_6\text{O}_3$  (526.18) C, 70.71; H, 4.21; N, 15.96. Found: C, 71.16; H, 4.25; N, 16.02.

**4'-Isopropoxy-2,2''-dioxo-2'-phenyl-1',2'-dihydro-4a'H-dispiro[indoline-3,5'  
cyclopenta[d]pyrimidine-6',3''-indoline]-4a',7'-dicarbonitrile (3q).**

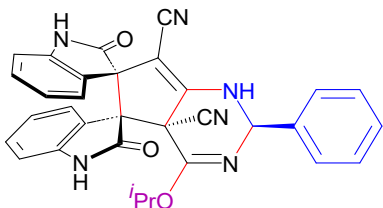

Colorless powder (98 mg from 1 mmol scale, 36% yield);  
mp: 262-263 °C (dec); IR (KBr,  $\text{cm}^{-1}$ ) 3377, 3251, 2205,  
1712, 1643, 1617;  $^1\text{H}$  NMR (500 MHz,  $\text{DMSO-}d_6$ )  $\delta$   
10.76 (s, 1H), 10.55 (s, 1H), 9.59 (s, 1H), 7.72 (d,  $J = 7.6$   
Hz, 1H), 7.53 – 7.51 (m, 2H), 7.49 – 7.46 (m, 2H), 7.42 (t,

$J = 7.1$  Hz, 1H), 7.29 (d,  $J = 7.7$  Hz, 1H), 7.23 (t,  $J = 7.7$  Hz, 1H), 7.16 (t,  $J = 7.7$  Hz, 1H), 7.01 (t,  
 $J = 7.7$  Hz, 1H), 6.94 (t,  $J = 7.7$  Hz, 1H), 6.69 (d,  $J = 7.8$  Hz, 1H), 6.61 (d,  $J = 7.8$  Hz, 1H), 6.14  
(s, 1H), 4.50 – 4.42 (m, 1H), 1.72 (d,  $J = 6.8$  Hz, 3H), 1.58 (d,  $J = 6.9$  Hz, 3H);  $^{13}\text{C}\{^1\text{H}\}$  NMR  
(125 MHz,  $\text{DMSO-}d_6$ )  $\delta$  176.6, 173.9, 154.2, 153.0, 142.9, 142.8, 140.4, 130.0, 129.8, 128.4,  
128.3, 127.6, 126.2, 125.8, 123.9, 122.7, 122.1, 121.9, 115.7, 113.7, 109.4, 109.2, 71.7, 71.5, 70.1,  
62.6, 58.6, 46.6, 23.7, 22.2. MS:  $m/z$  (%): 539 (14), 513 (16), 428 (19), 379 (33), 290 (55), 233  
(100), 132 (75), 77 (46). Anal. Calcd for  $\text{C}_{32}\text{H}_{24}\text{N}_6\text{O}_3$  (540.19) C, 71.10; H, 4.48; N, 15.55. Found:  
C, 71.46; H, 4.53; N, 15.60.

## 7. NMR Spectra

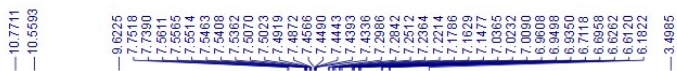

$^1\text{H}$  NMR (500 MHz,  $\text{DMSO-}d_6$ ) spectrum of compound **3a**

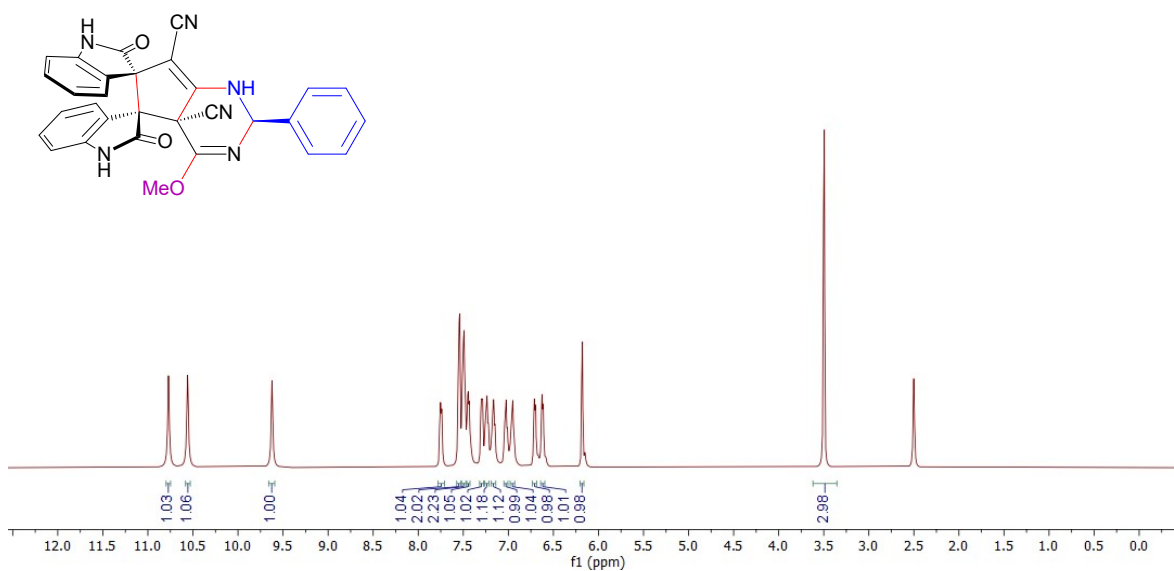

$^{13}\text{C}\{^1\text{H}\}$  NMR (125 MHz,  $\text{DMSO-}d_6$ ) spectrum of compound **3a**

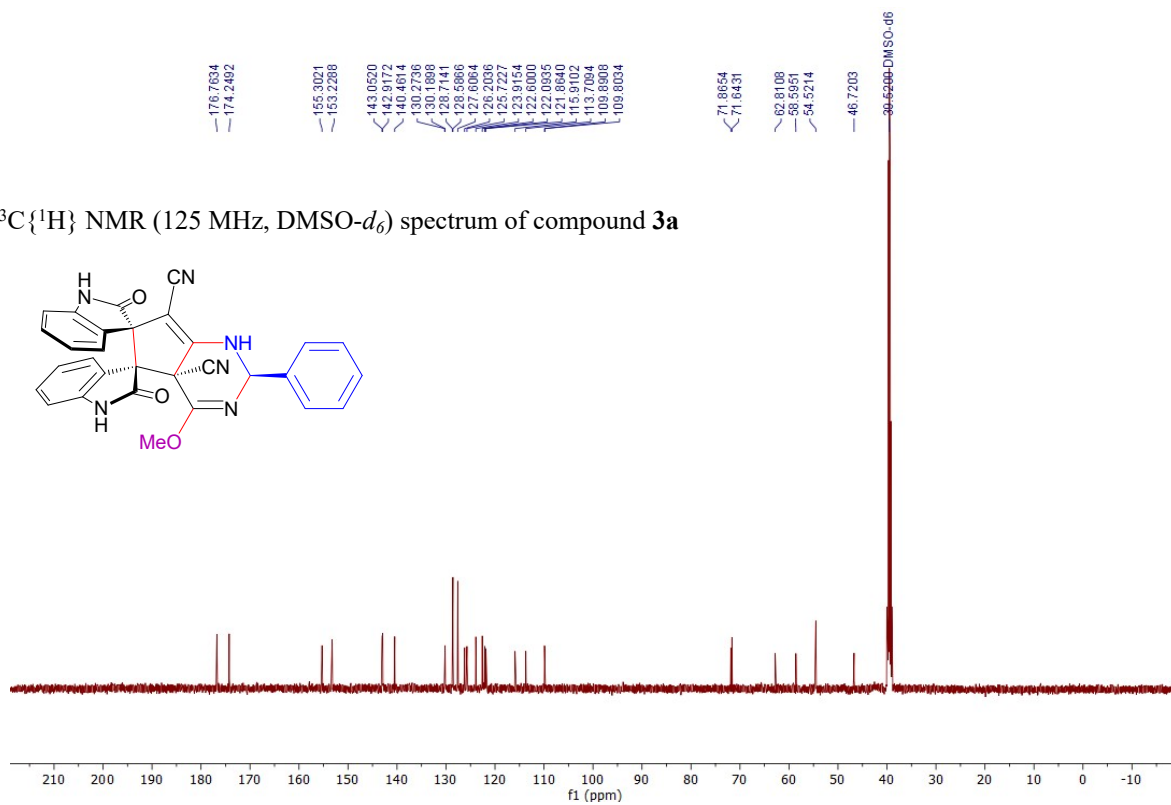

$^1\text{H}$  NMR (500 MHz,  $\text{DMSO-}d_6$ ) spectrum of compound **3b**

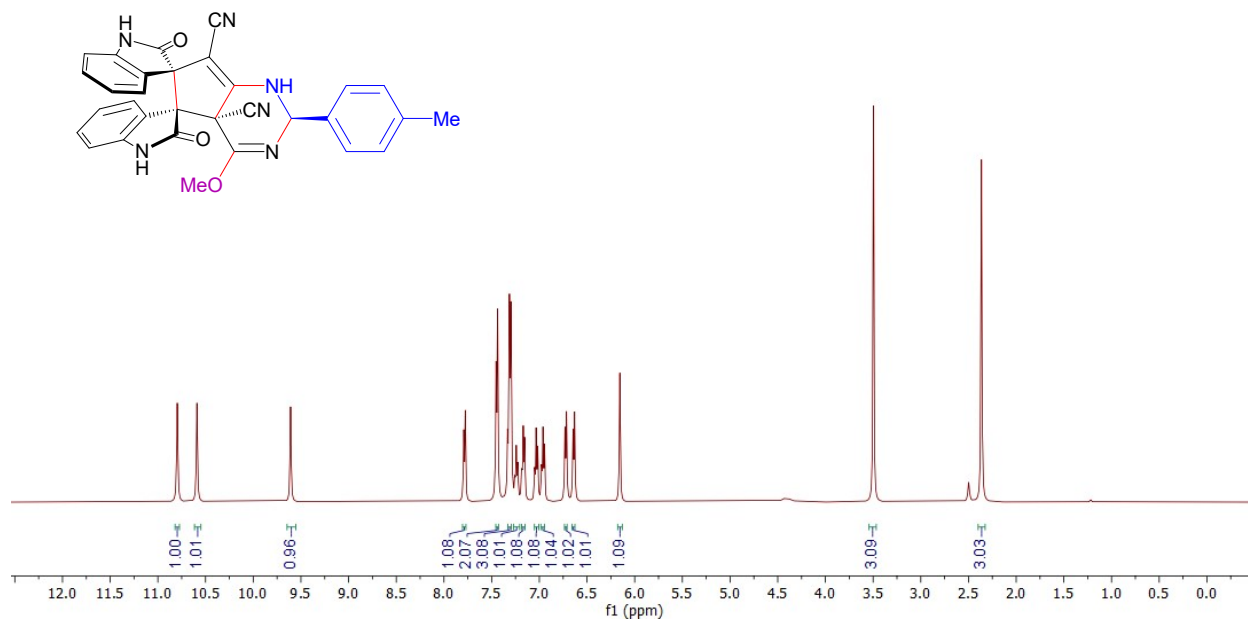



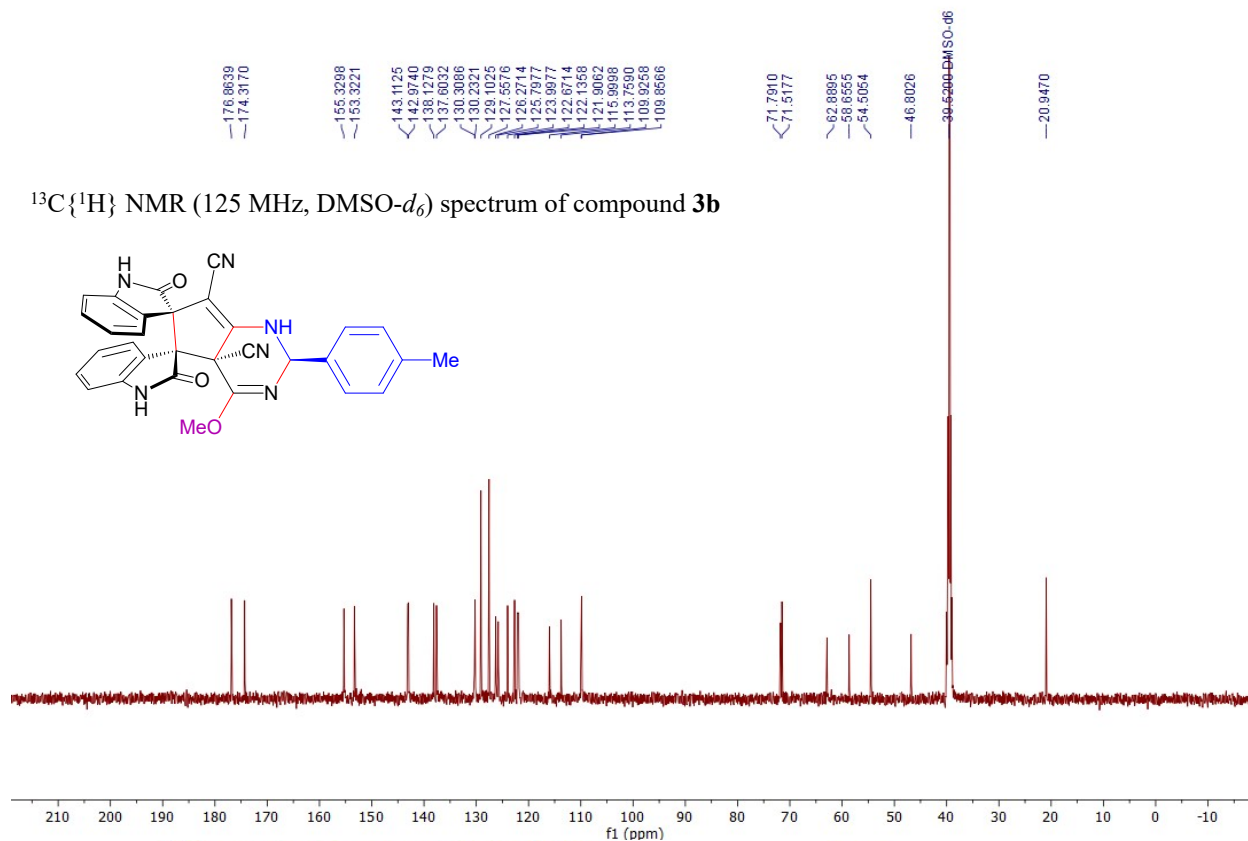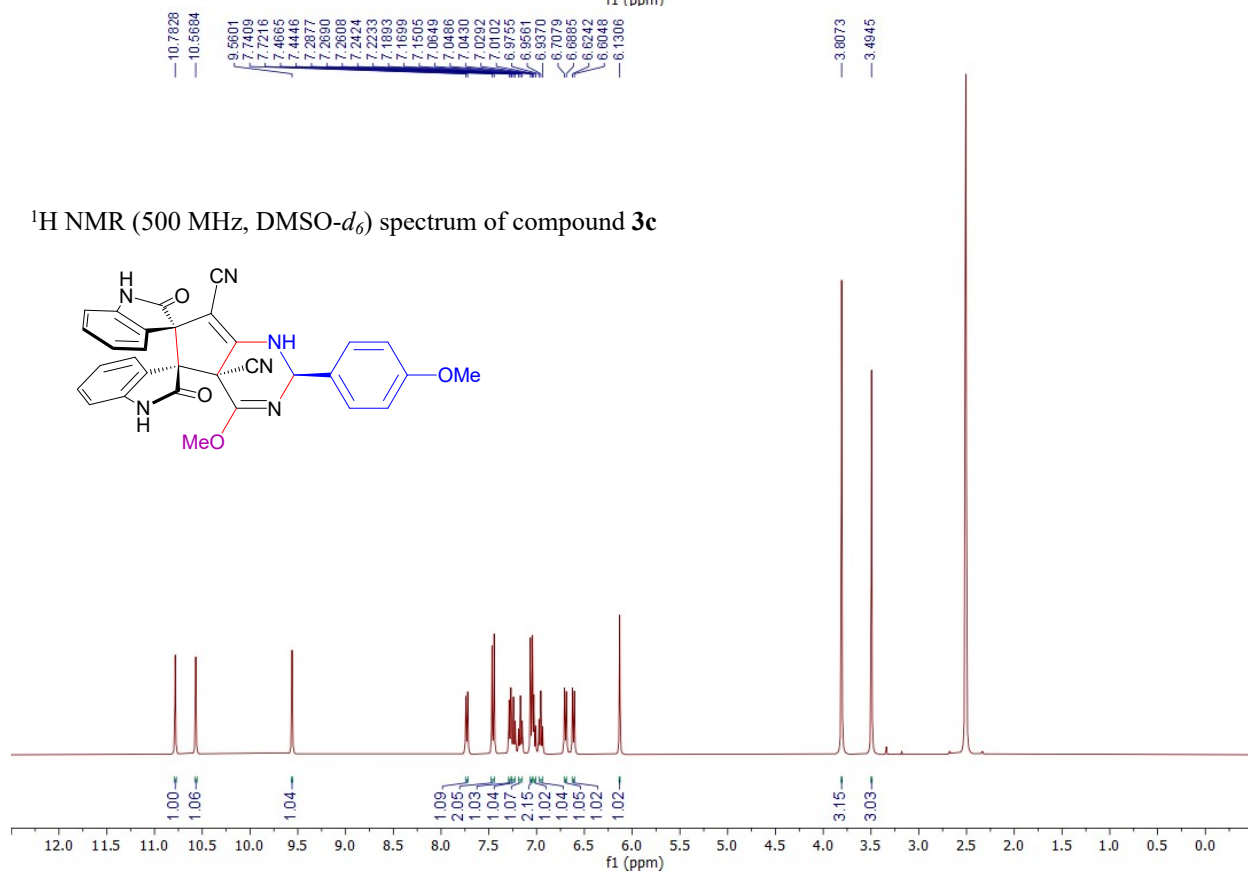

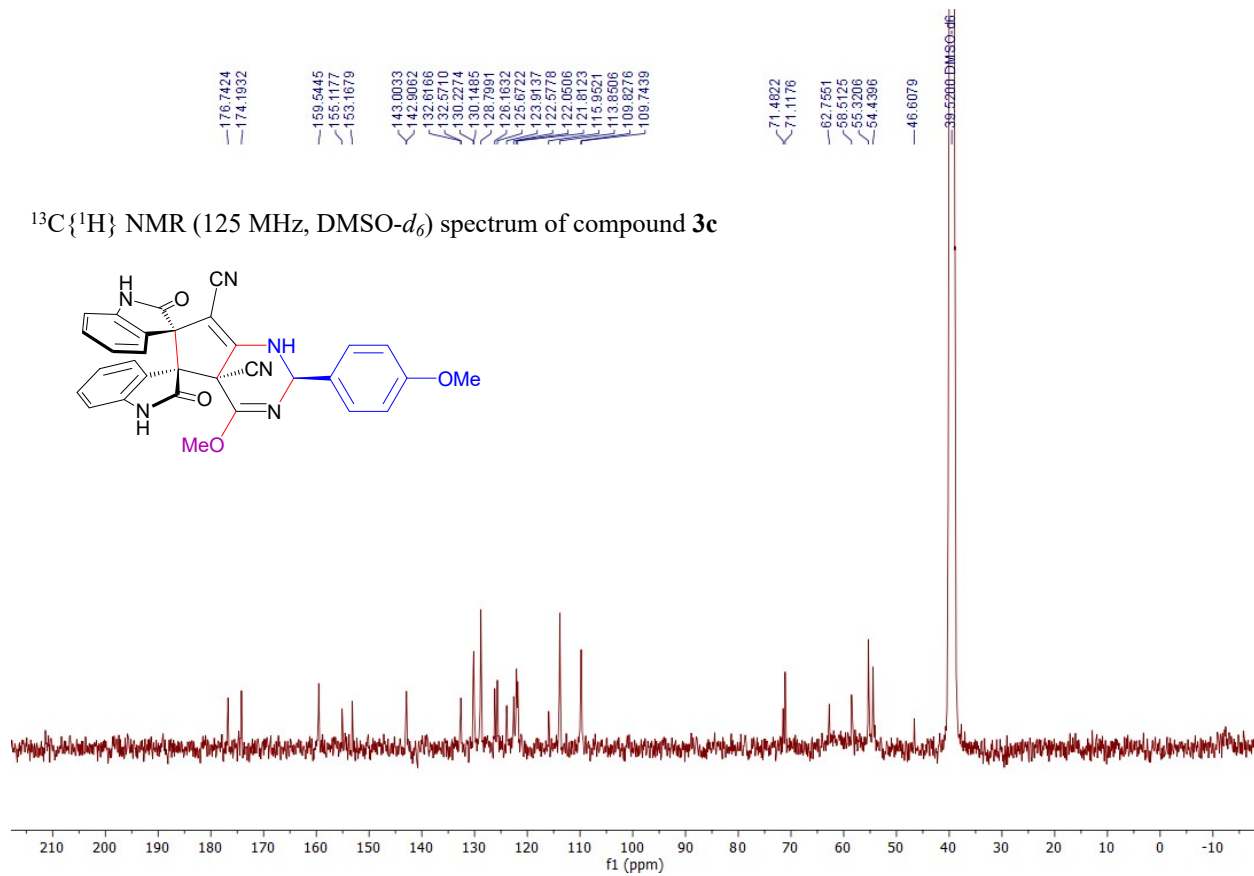

-10.7254  
 -10.5220  
 -9.4449  
 7.7324  
 7.7300  
 7.7168  
 7.7144  
 7.3188  
 7.3105  
 7.3005  
 7.2897  
 7.2693  
 7.2577  
 7.2382  
 7.2355  
 7.2227  
 7.2074  
 7.2047  
 7.1817  
 7.1589  
 7.1464  
 7.1437  
 7.1309  
 7.1284  
 7.0235  
 7.0235  
 7.0104  
 7.0082  
 6.9951  
 6.9927  
 6.9486  
 6.9445  
 6.9314  
 6.9292  
 6.9161  
 6.9140  
 6.8986  
 6.8970  
 6.8677  
 6.8623  
 6.8581  
 6.8544  
 6.8495  
 6.6062  
 6.5907  
 6.3106  
 3.8847  
 3.8081  
 3.5189

$^1\text{H}$  NMR (500 MHz,  $\text{DMSO-}d_6$ ) spectrum of compound **3d**

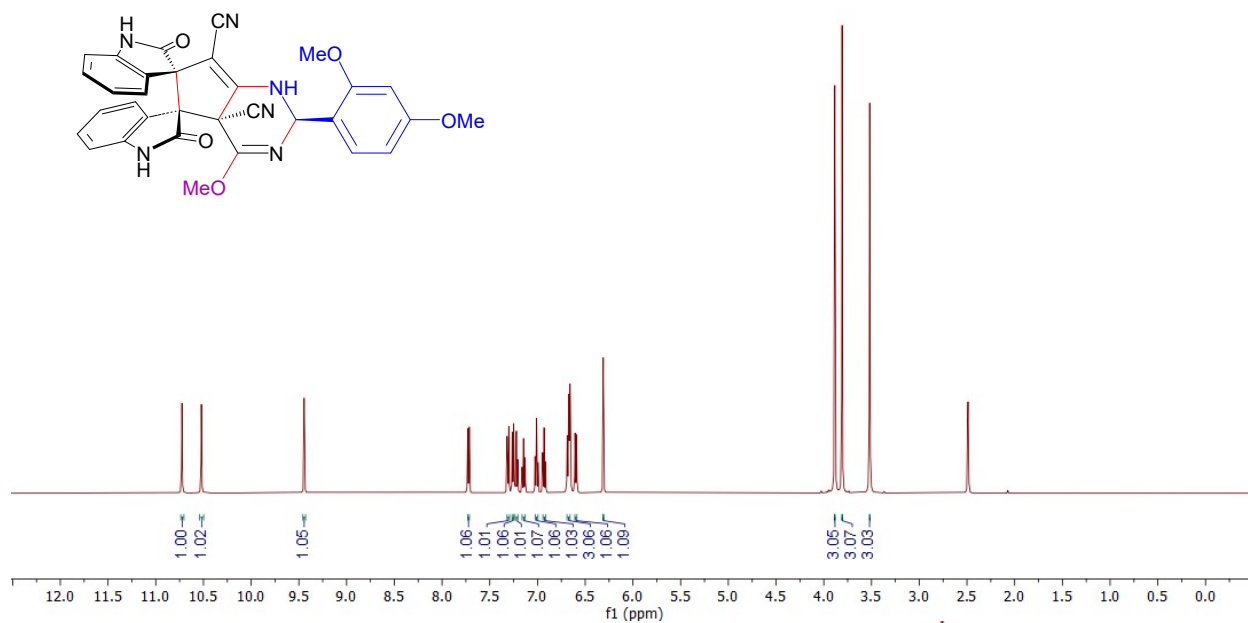

176.8347  
 174.1032  
 160.9335  
 157.0334  
 156.9136  
 153.3774  
 142.9550  
 142.8400  
 130.1143  
 129.9814  
 128.0638  
 126.0147  
 125.6147  
 123.9256  
 122.4710  
 121.9199  
 121.6741  
 119.8188  
 115.9139  
 113.3172  
 109.7135  
 109.6422  
 105.3805  
 98.0860  
 70.6365  
 64.9119  
 62.8663  
 58.5768  
 55.6868  
 55.3855  
 54.4023  
 47.0405  
 39.5200,  $\text{DMSO-}d_6$

$^{13}\text{C}\{^1\text{H}\}$  NMR (125 MHz,  $\text{DMSO-}d_6$ ) spectrum of compound **3d**

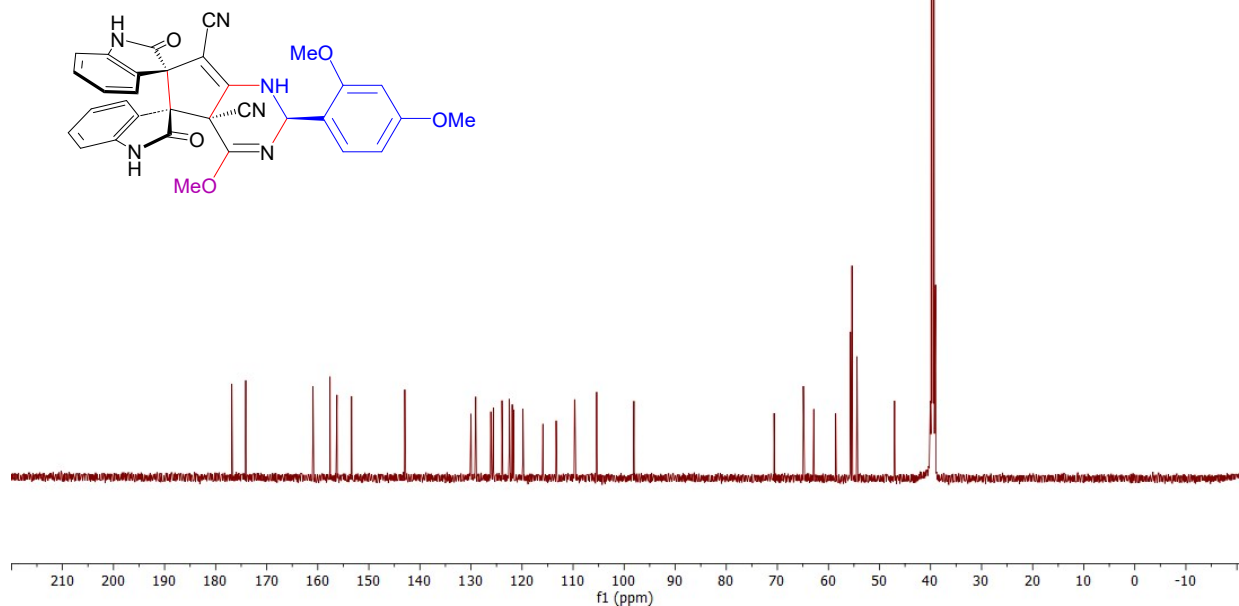

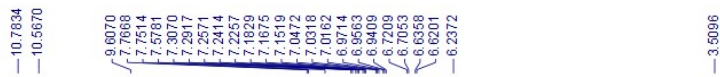

$^1\text{H}$  NMR (500 MHz,  $\text{DMSO-}d_6$ ) spectrum of compound **3e**

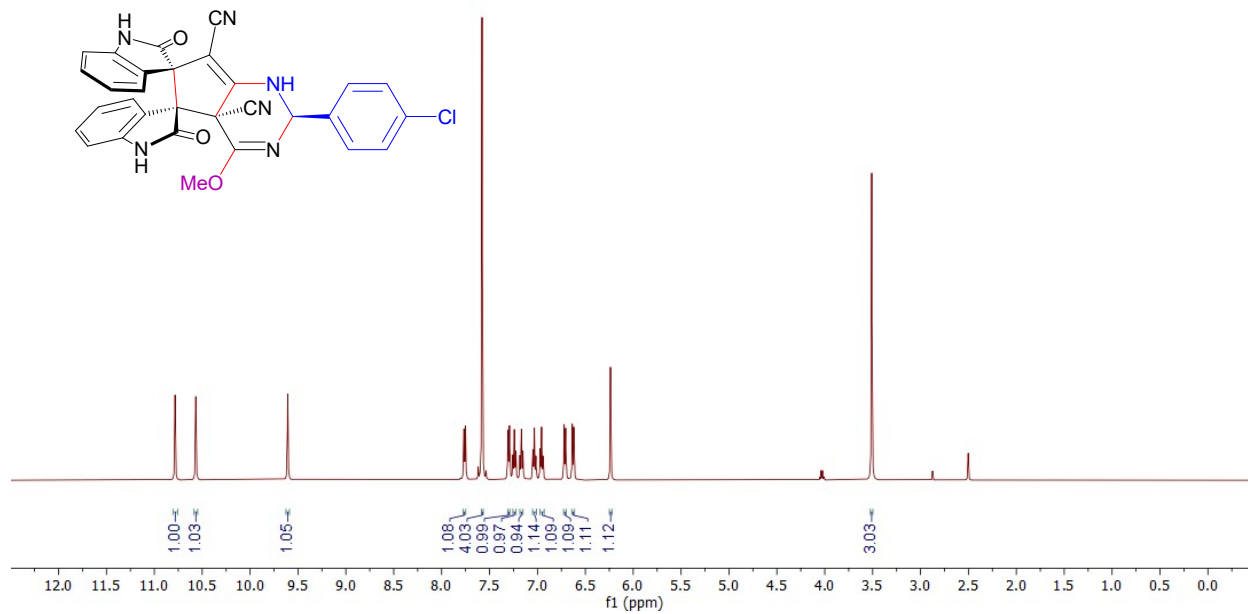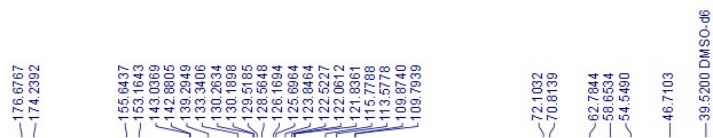

$^{13}\text{C}\{^1\text{H}\}$  NMR (125 MHz,  $\text{DMSO-}d_6$ ) spectrum of compound **3e**

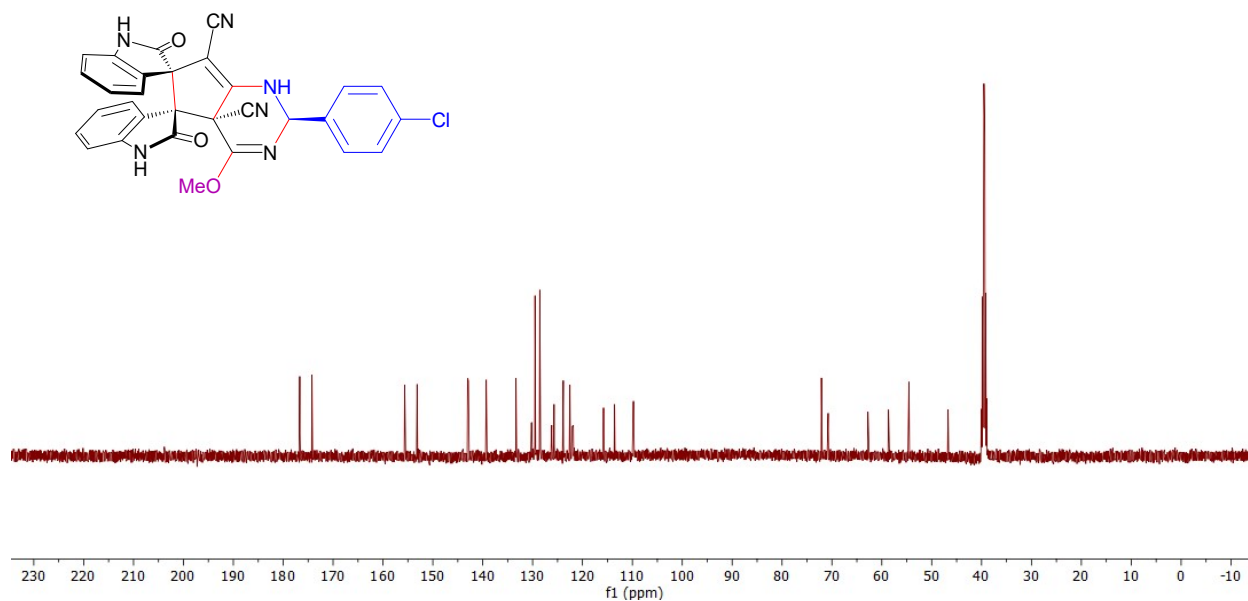

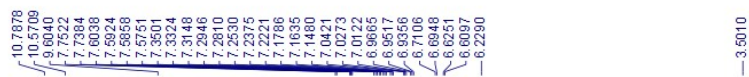

$^1\text{H}$  NMR (500 MHz,  $\text{DMSO-}d_6$ ) spectrum of compound **3f**

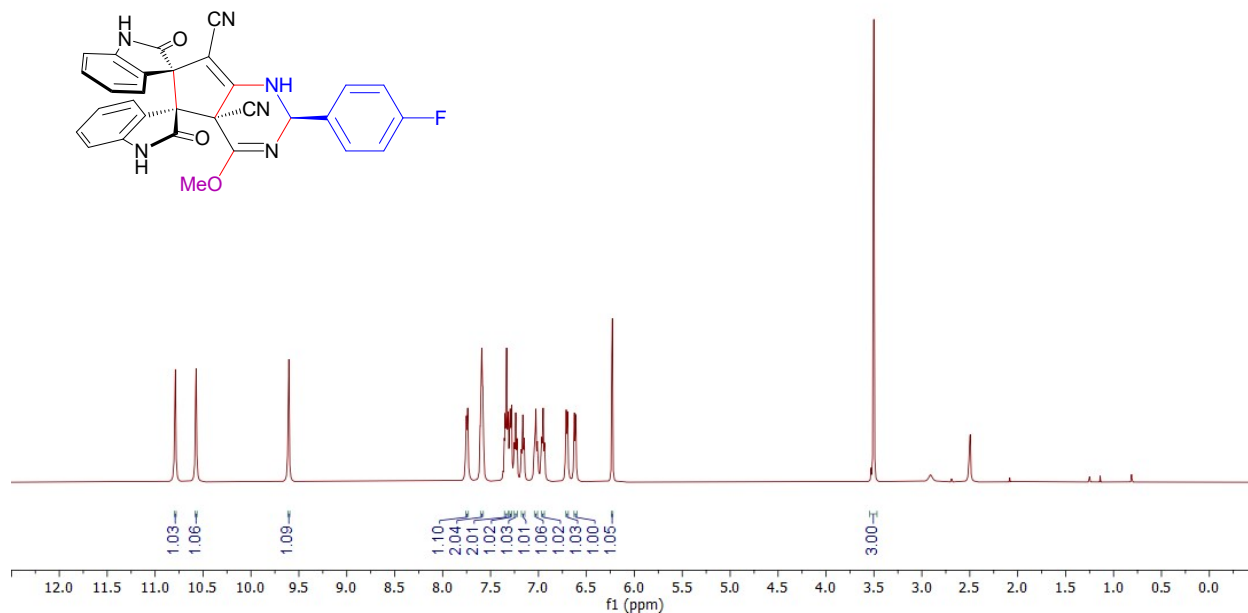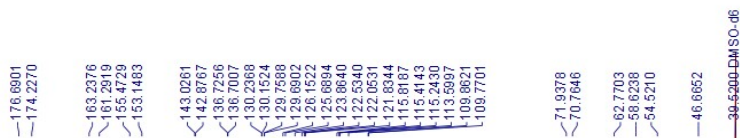

$^{13}\text{C}\{^1\text{H}\}$  NMR (125 MHz,  $\text{DMSO-}d_6$ ) spectrum of compound **3f**

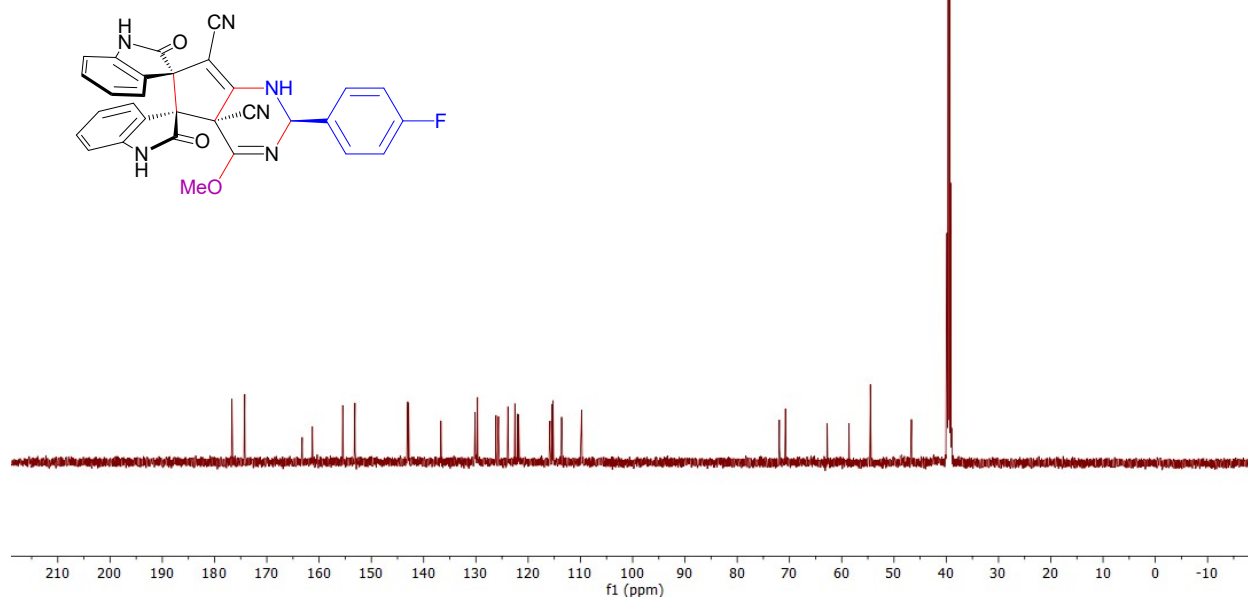

—113.5136

$^{19}\text{F}$  NMR (471 MHz,  $\text{DMSO-}d_6$ ) spectrum of compound **3f**

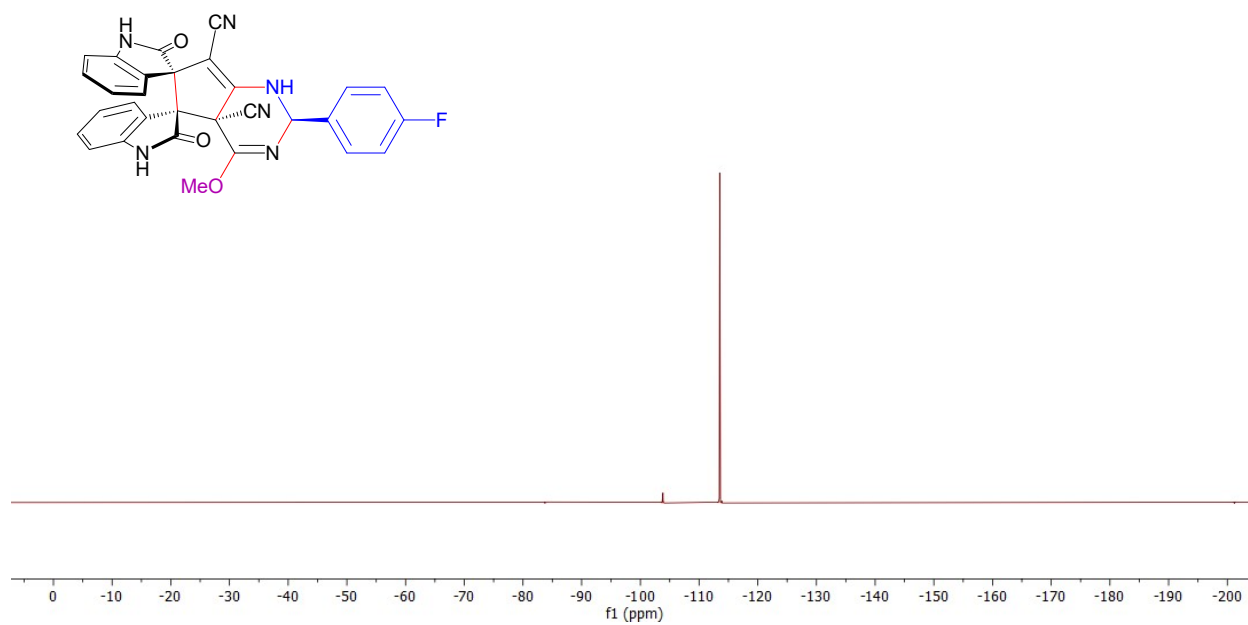

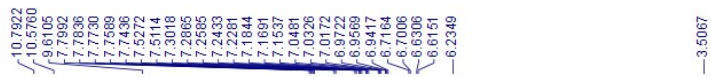

$^1\text{H}$  NMR (500 MHz,  $\text{DMSO-}d_6$ ) spectrum of compound **3g**

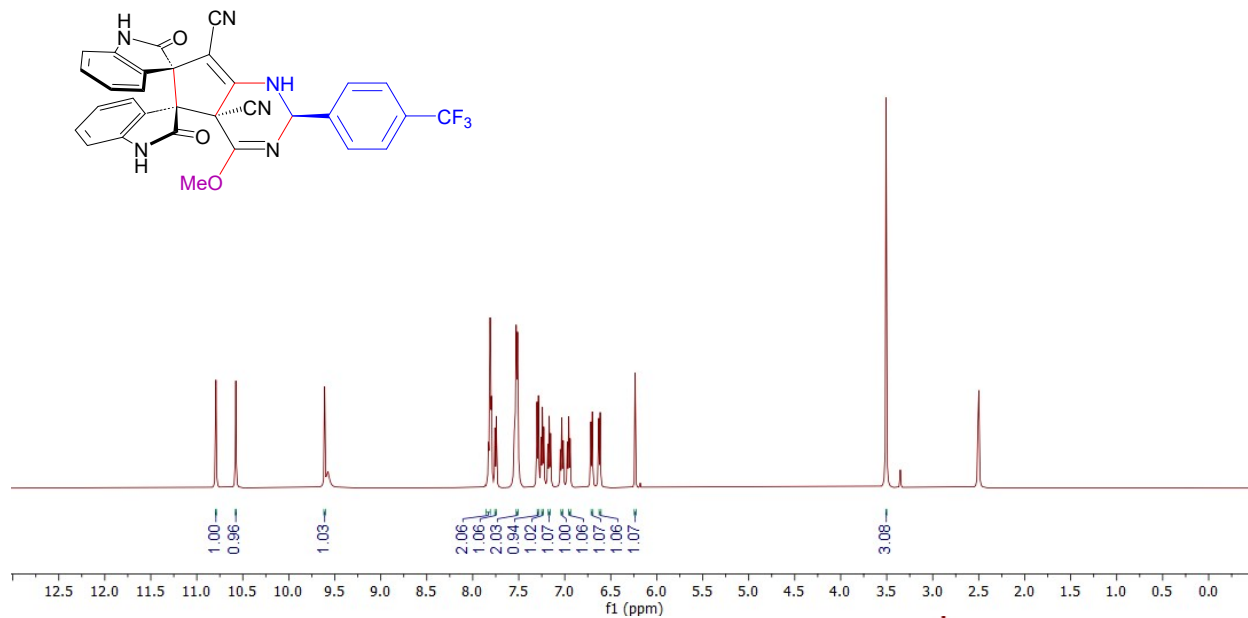

$^{13}\text{C}\{^1\text{H}\}$  NMR (125 MHz,  $\text{DMSO-}d_6$ ) spectrum of compound **3g**

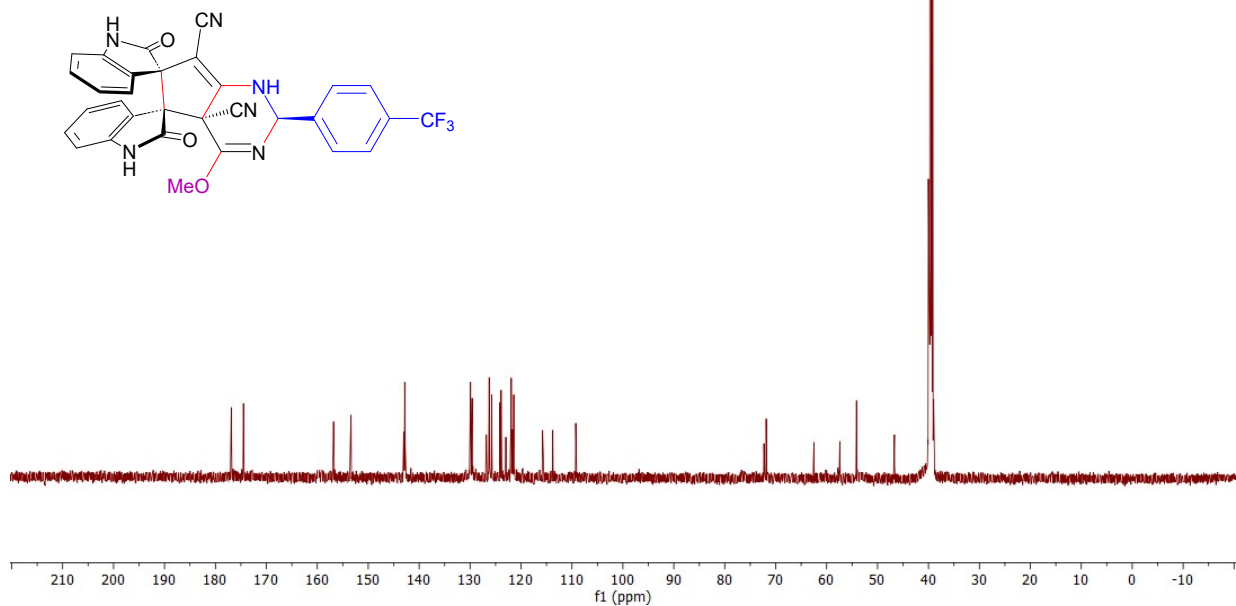

$^{19}\text{F}$  NMR (471 MHz,  $\text{DMSO-}d_6$ ) spectrum of compound **3g**

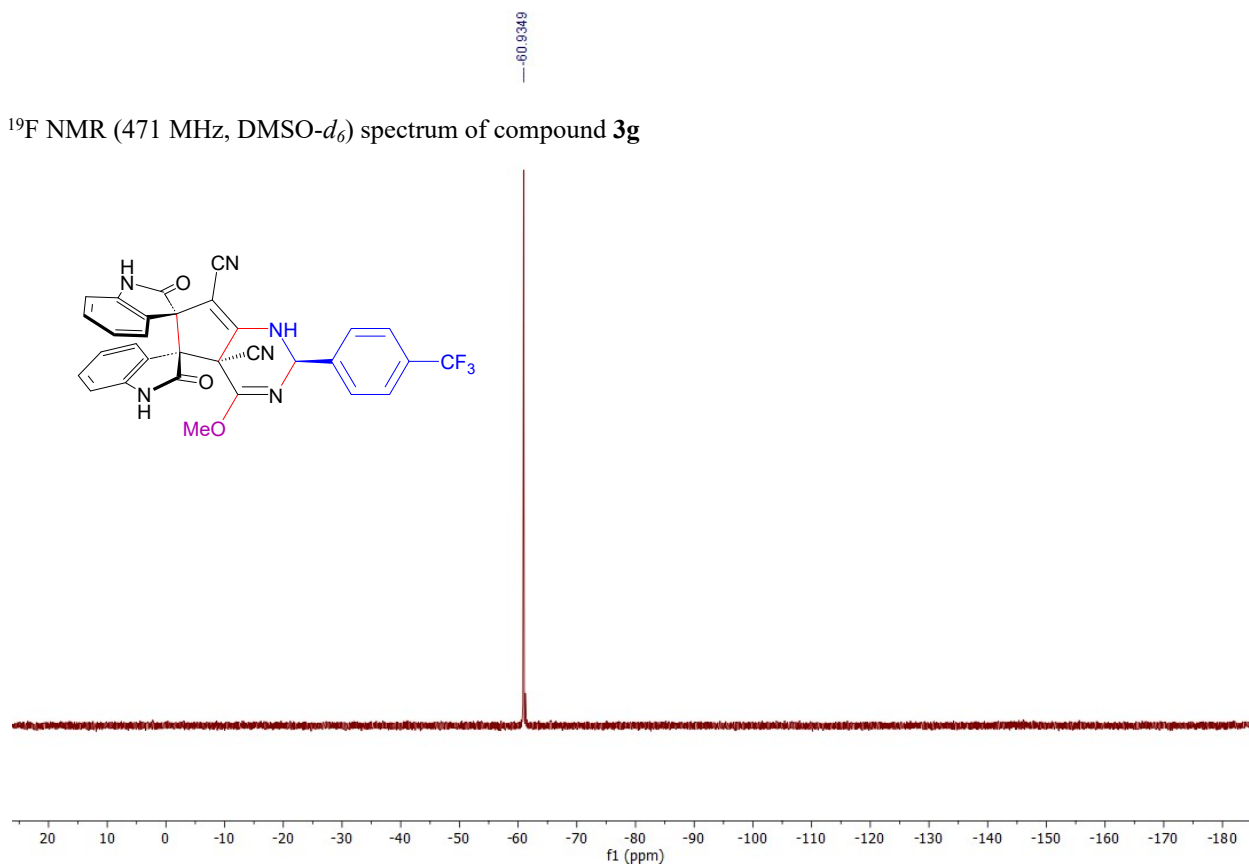



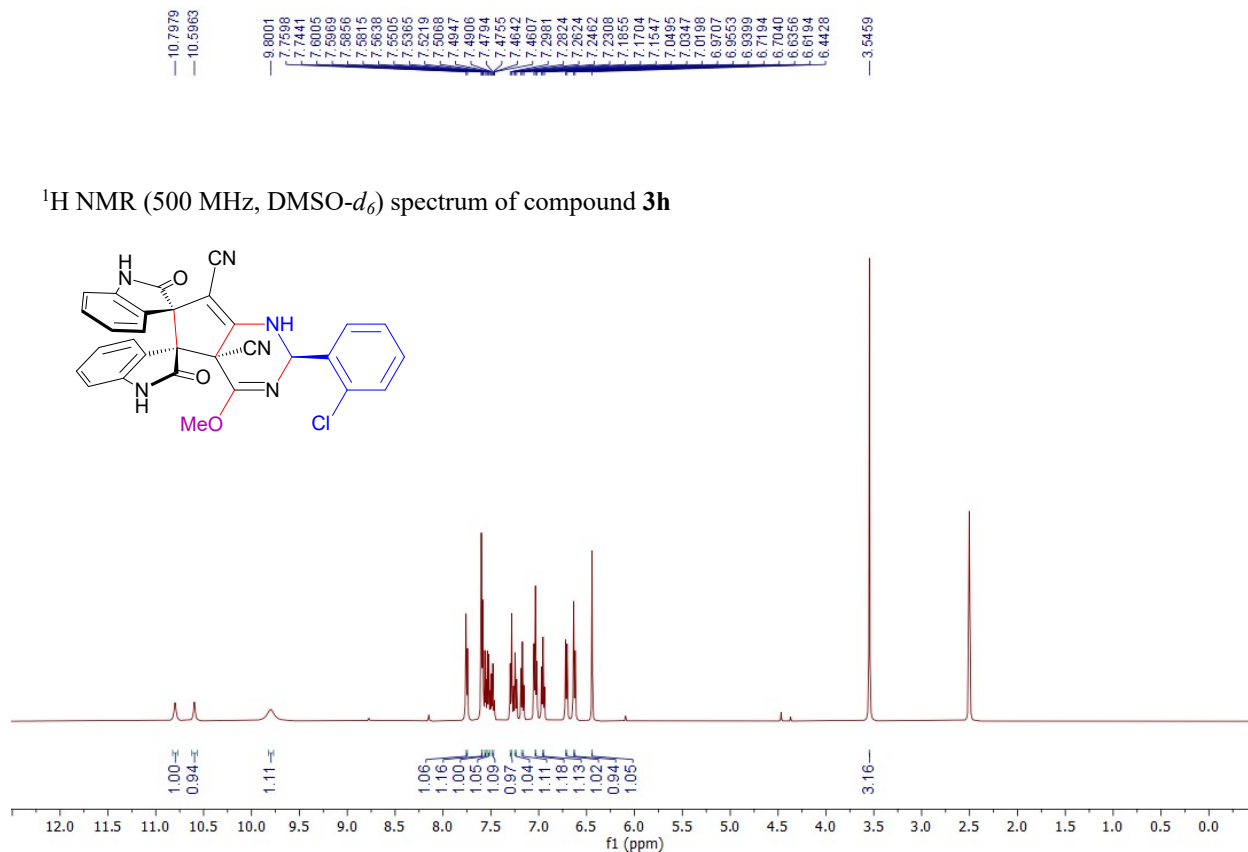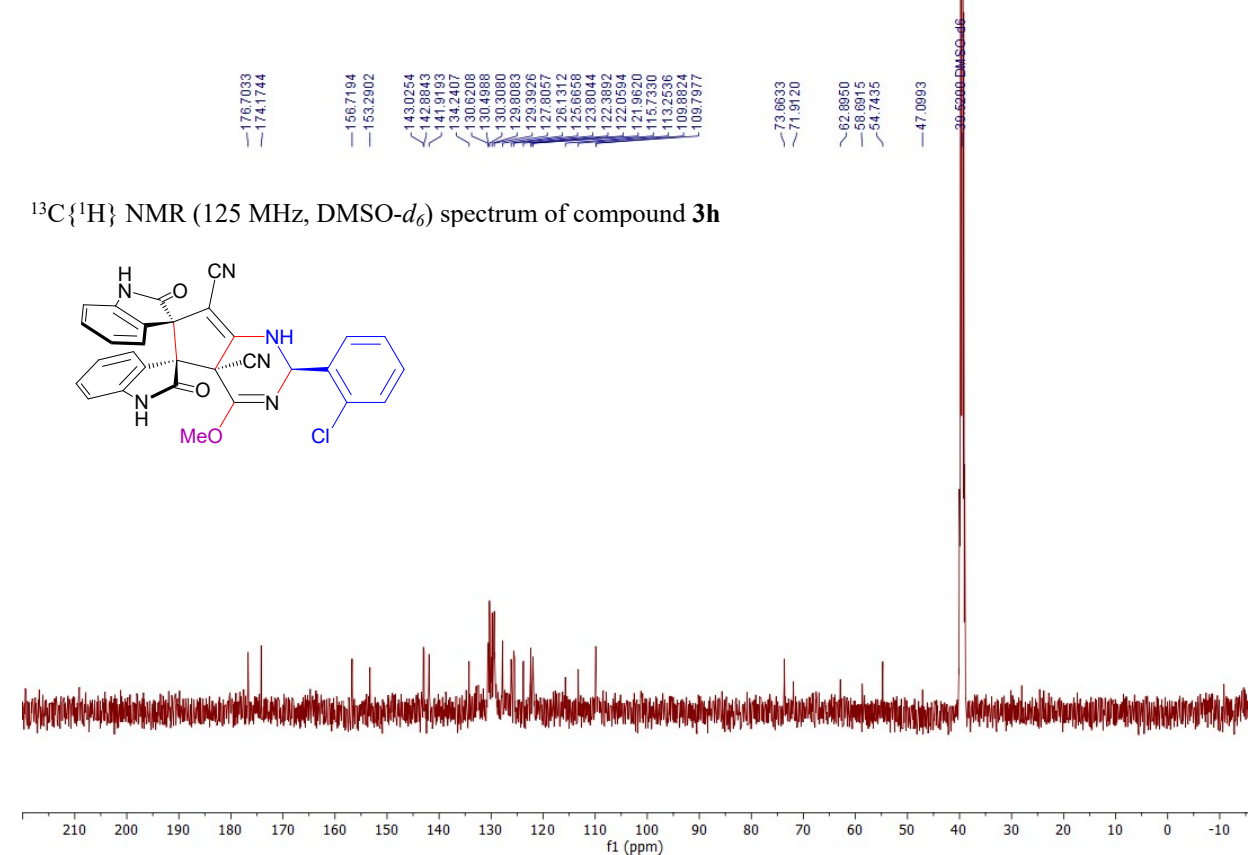

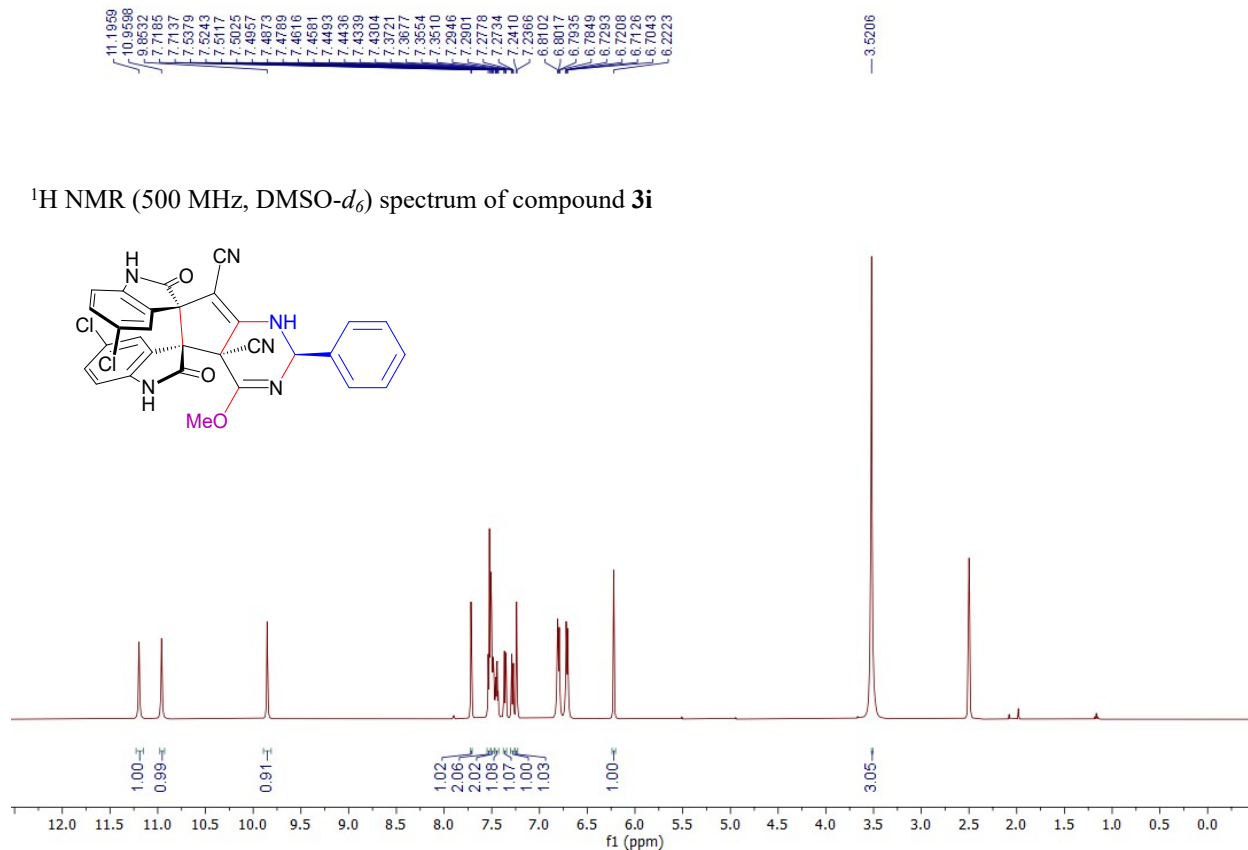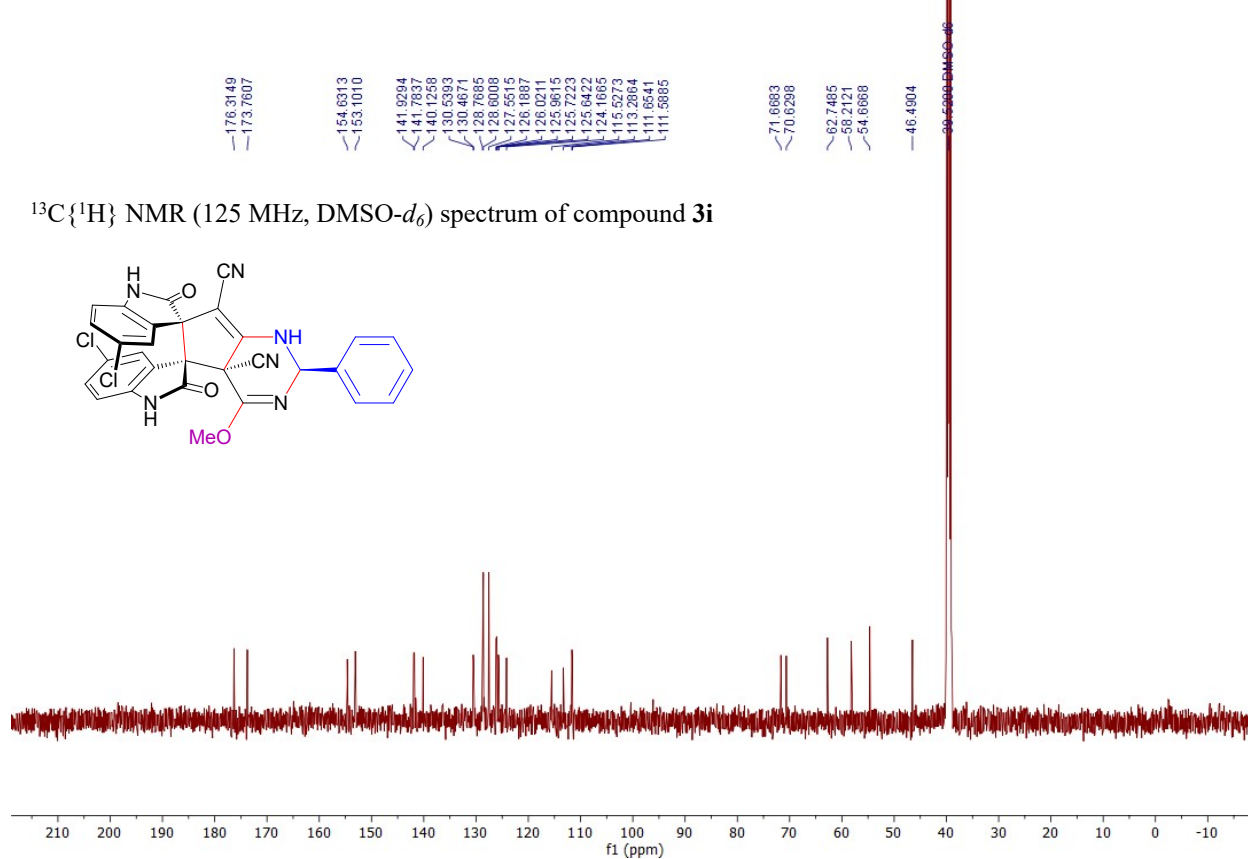

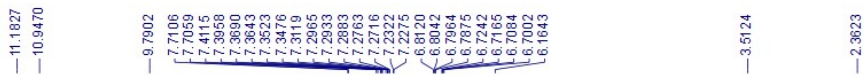

$^1\text{H}$  NMR (500 MHz,  $\text{DMSO-}d_6$ ) spectrum of compound **3j**

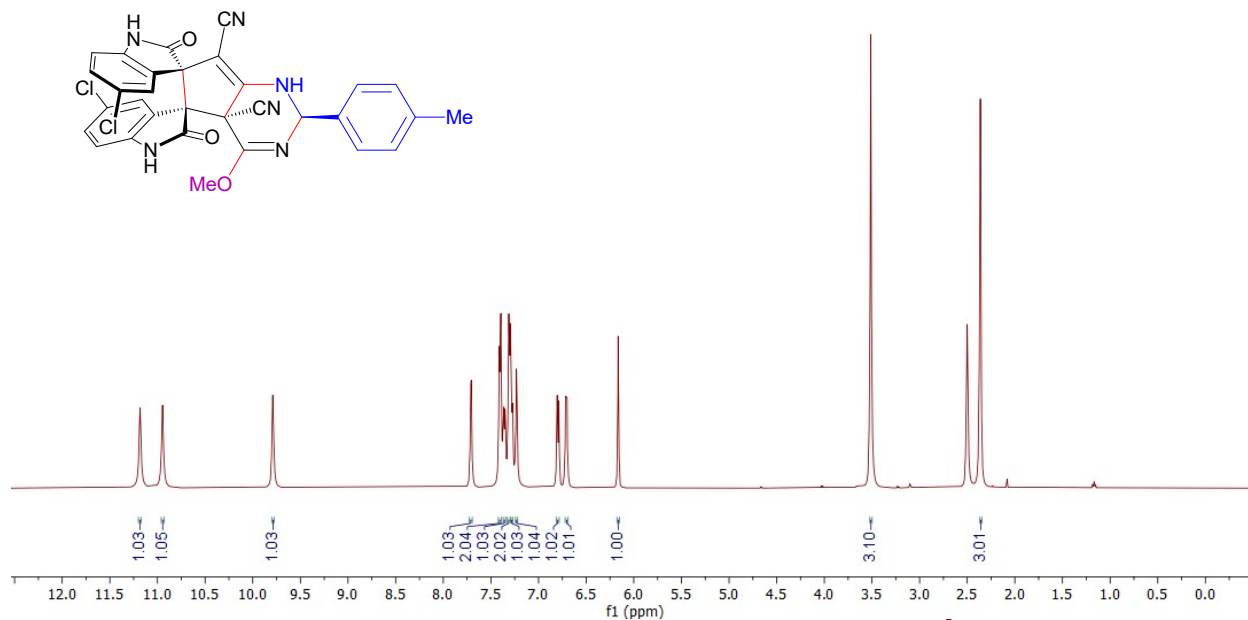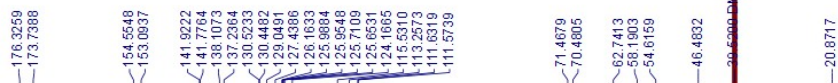

$^{13}\text{C}\{^1\text{H}\}$  NMR (125 MHz,  $\text{DMSO-}d_6$ ) spectrum of compound **3j**

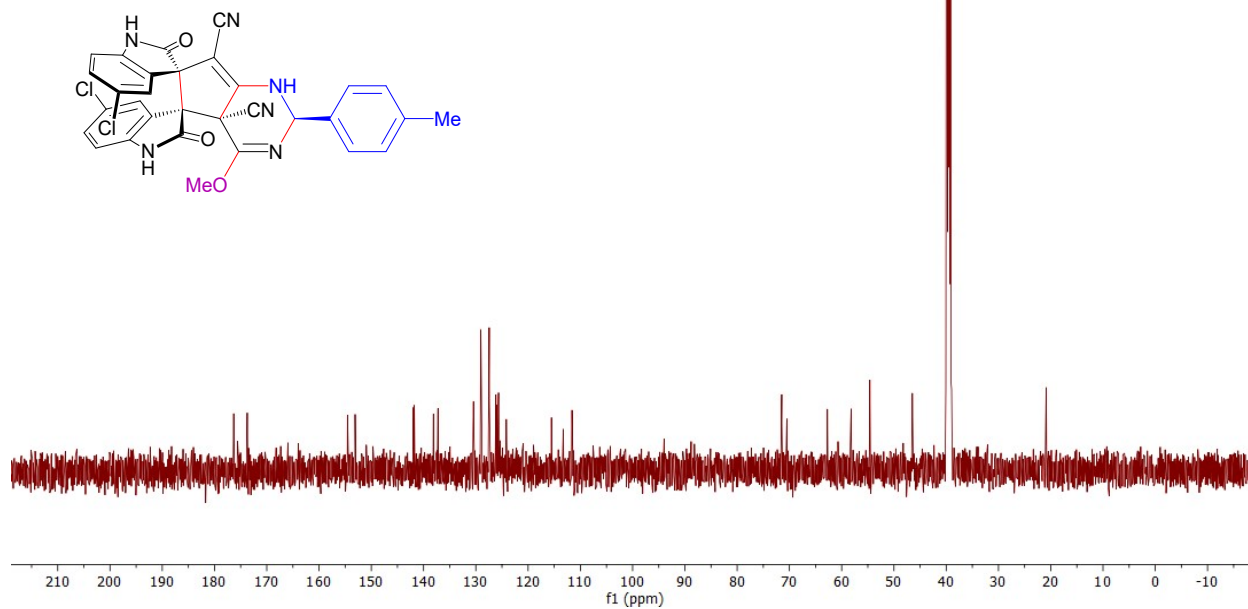

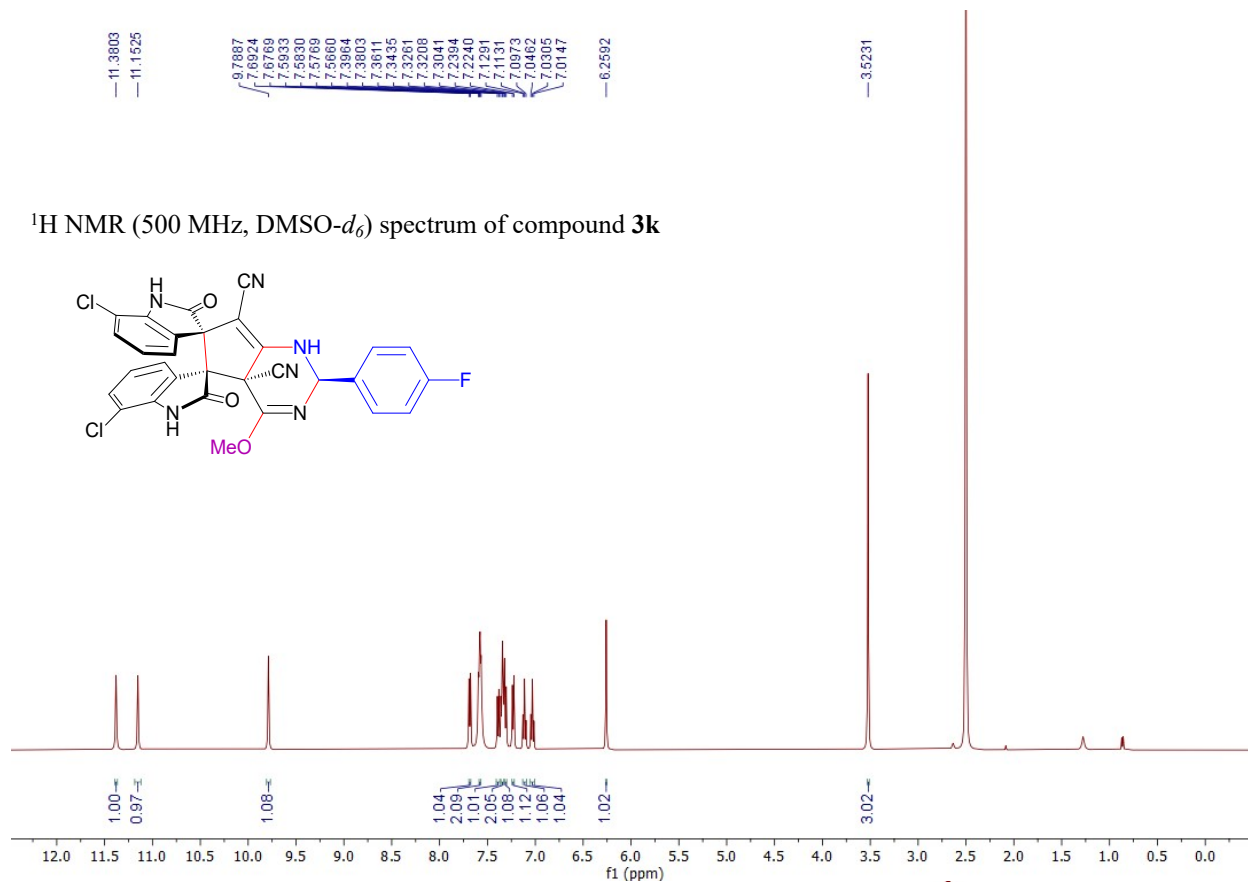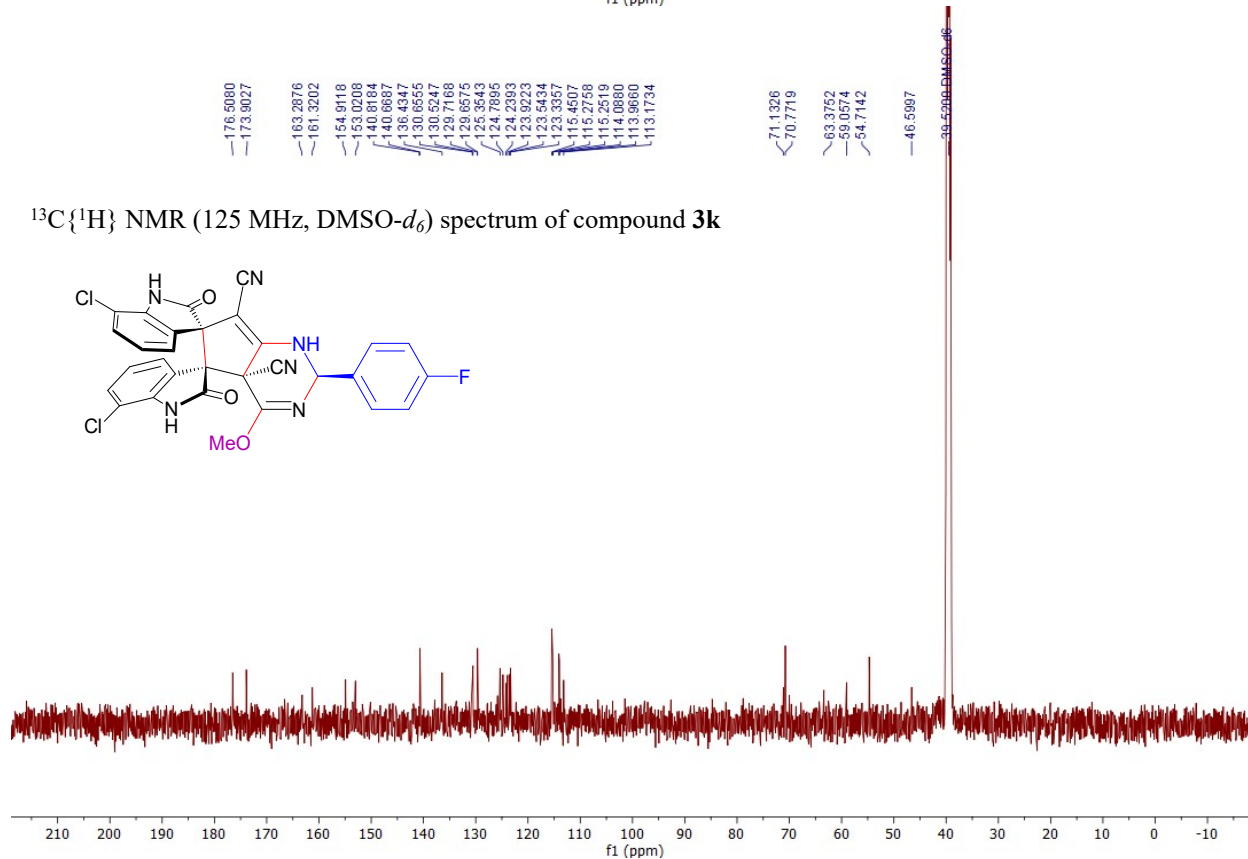

$^{19}\text{F}$  NMR (471 MHz,  $\text{DMSO-}d_6$ ) spectrum of compound **3k**

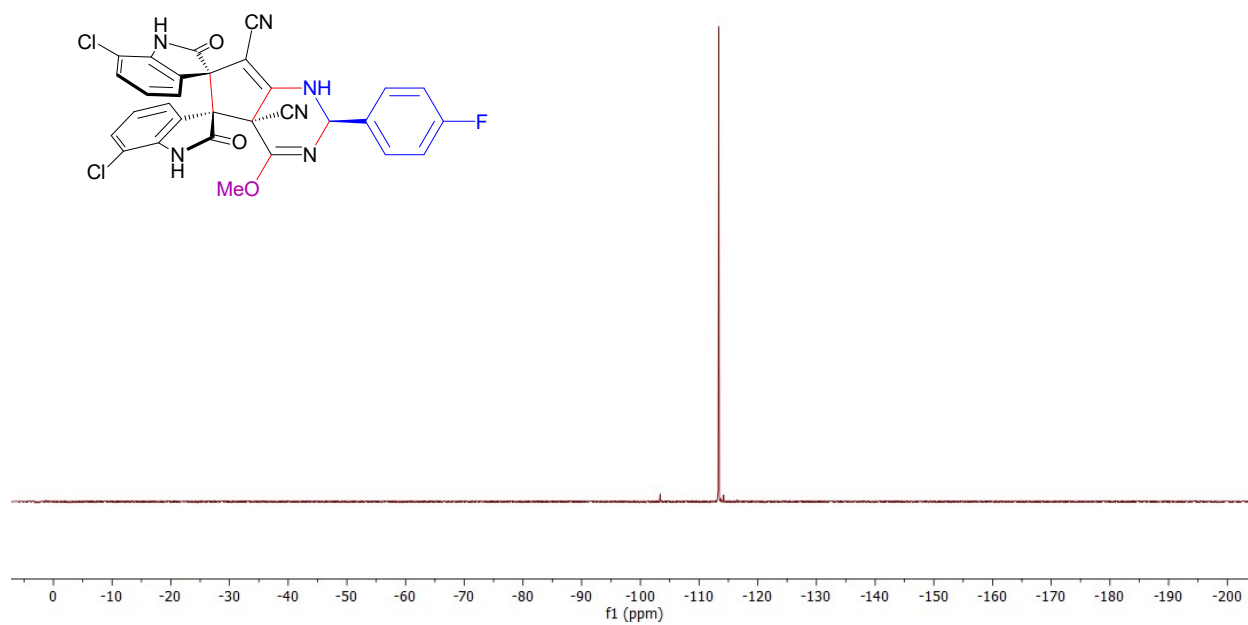

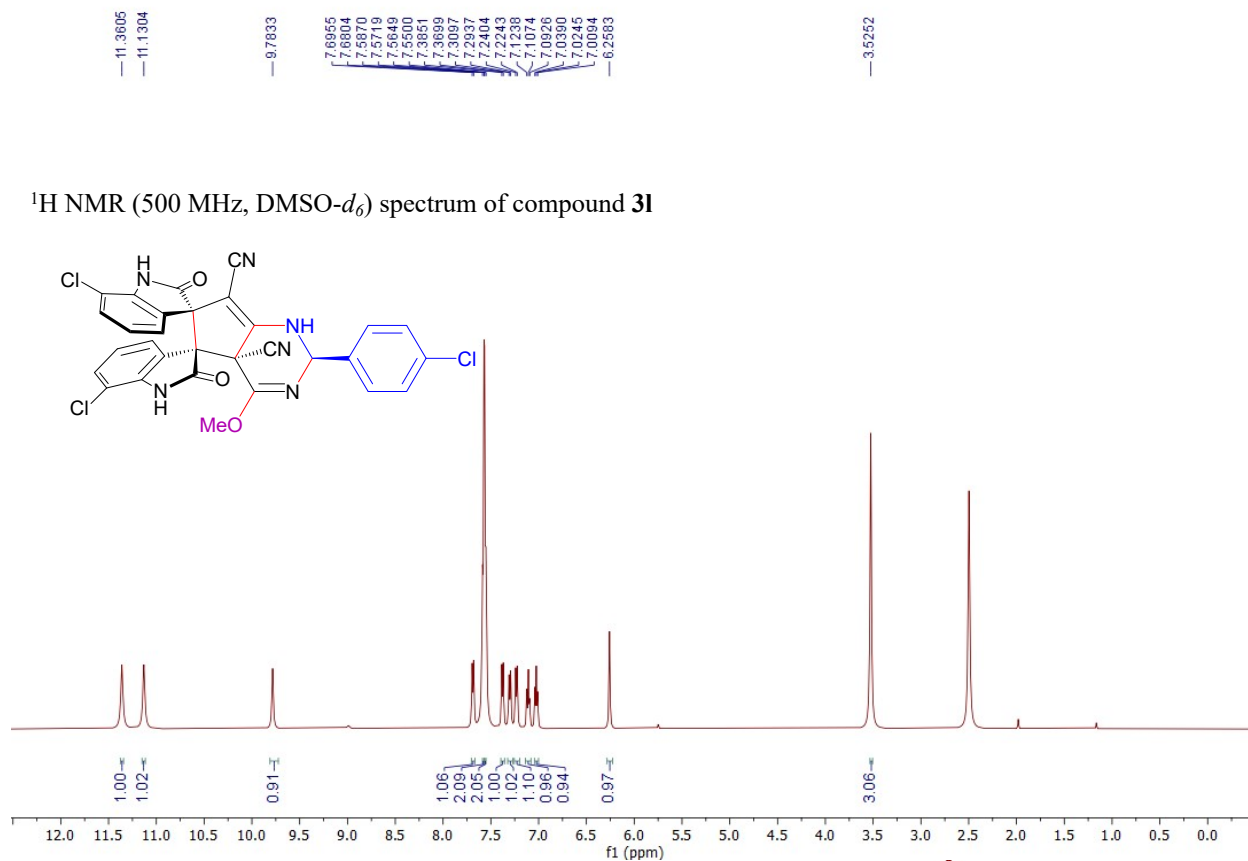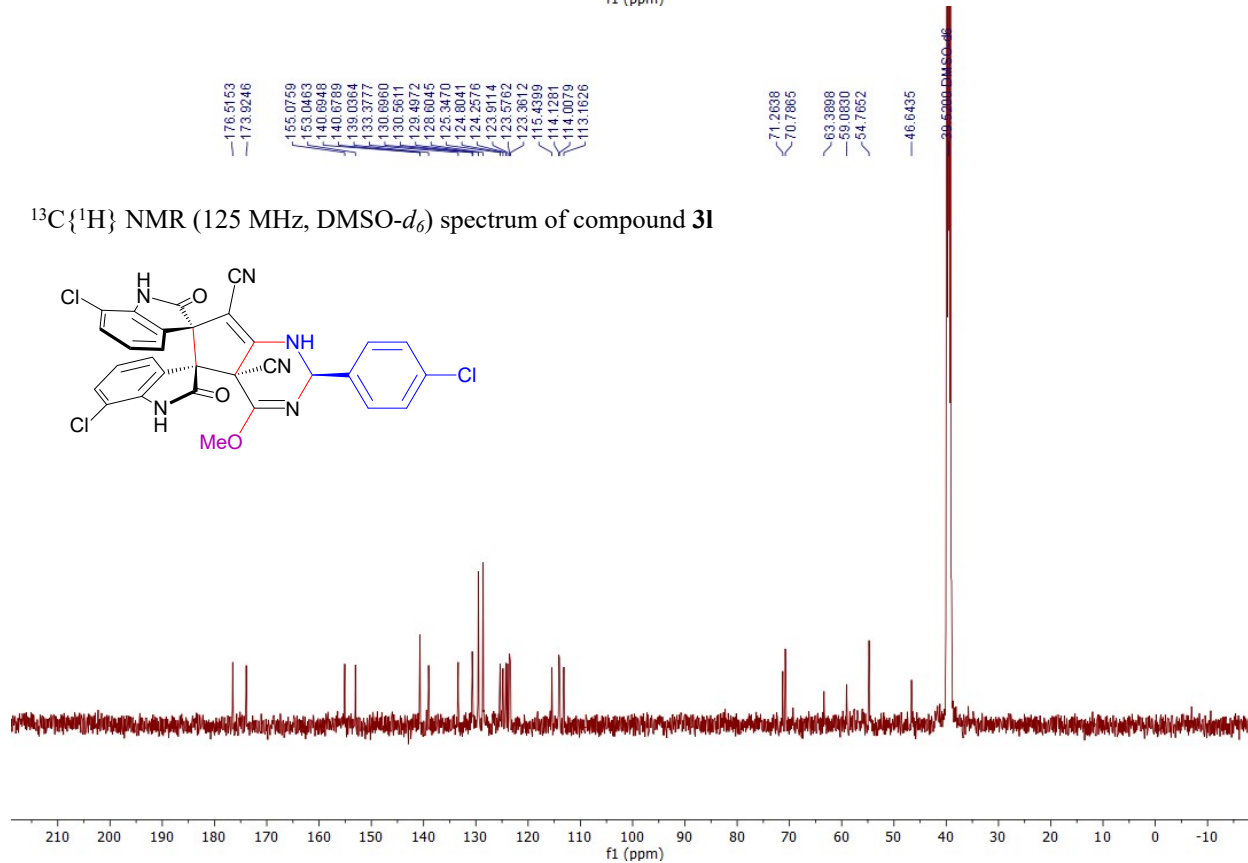

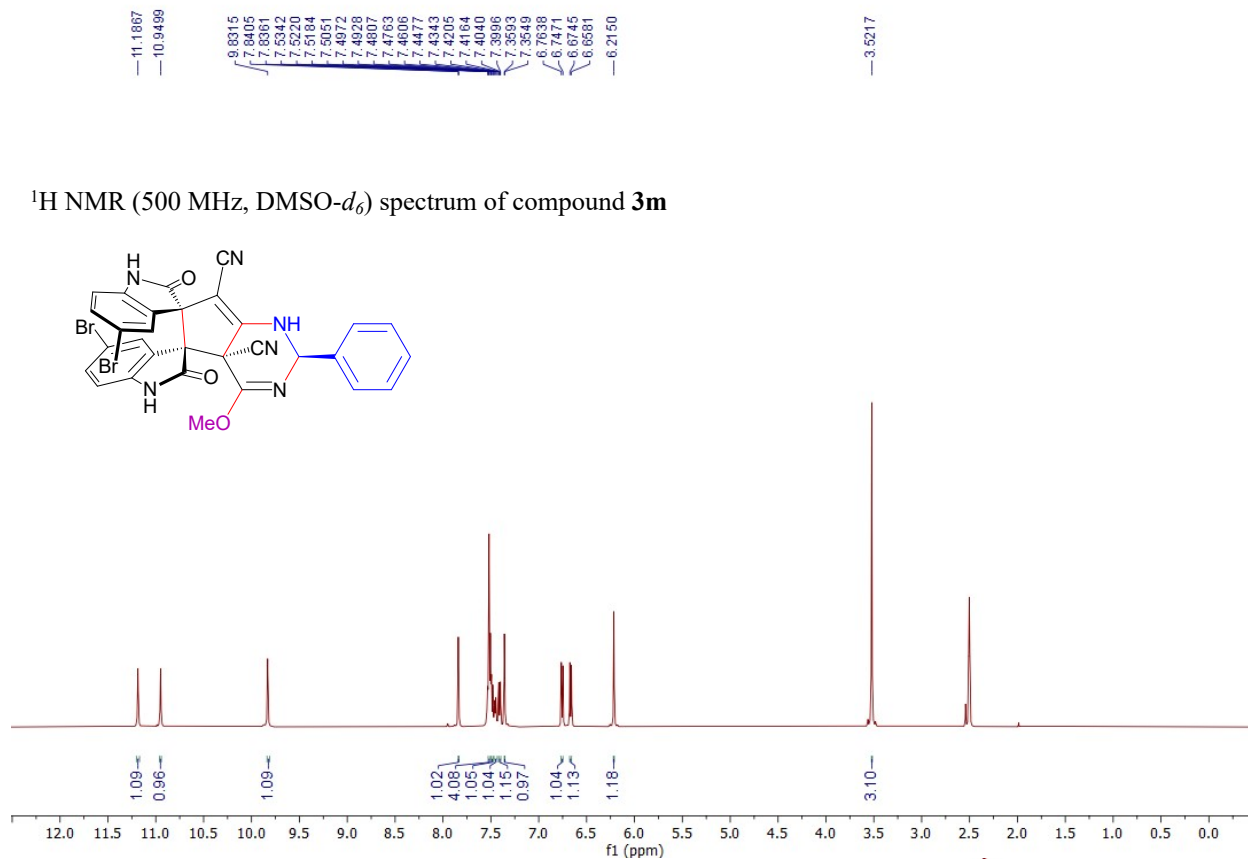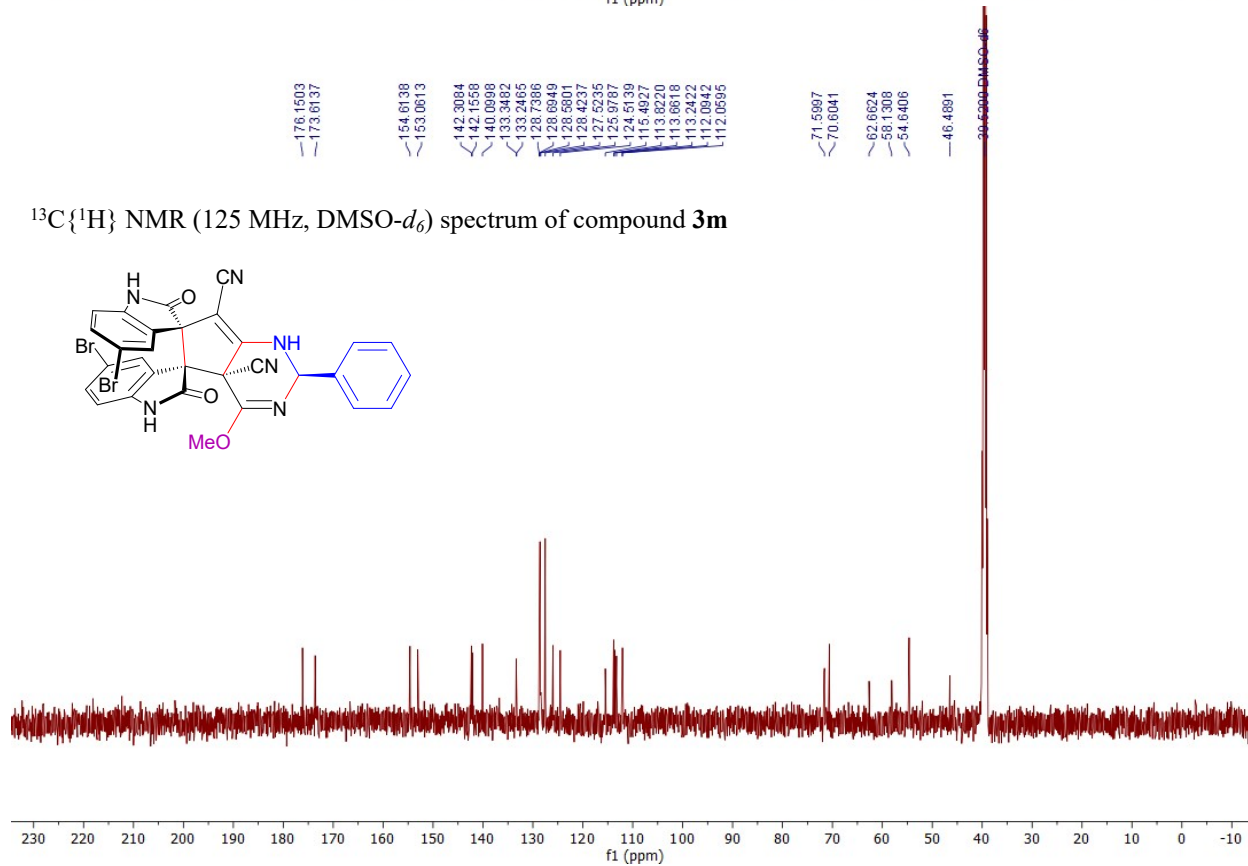

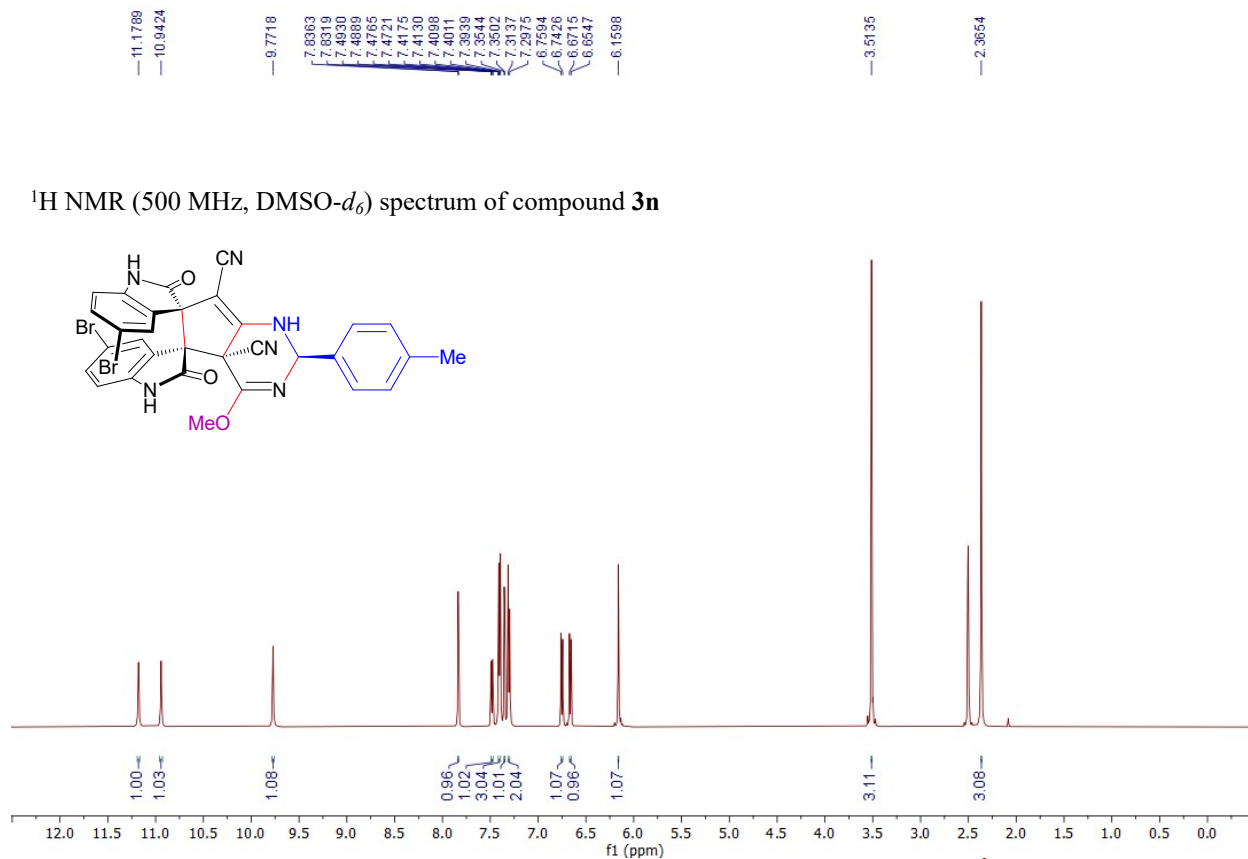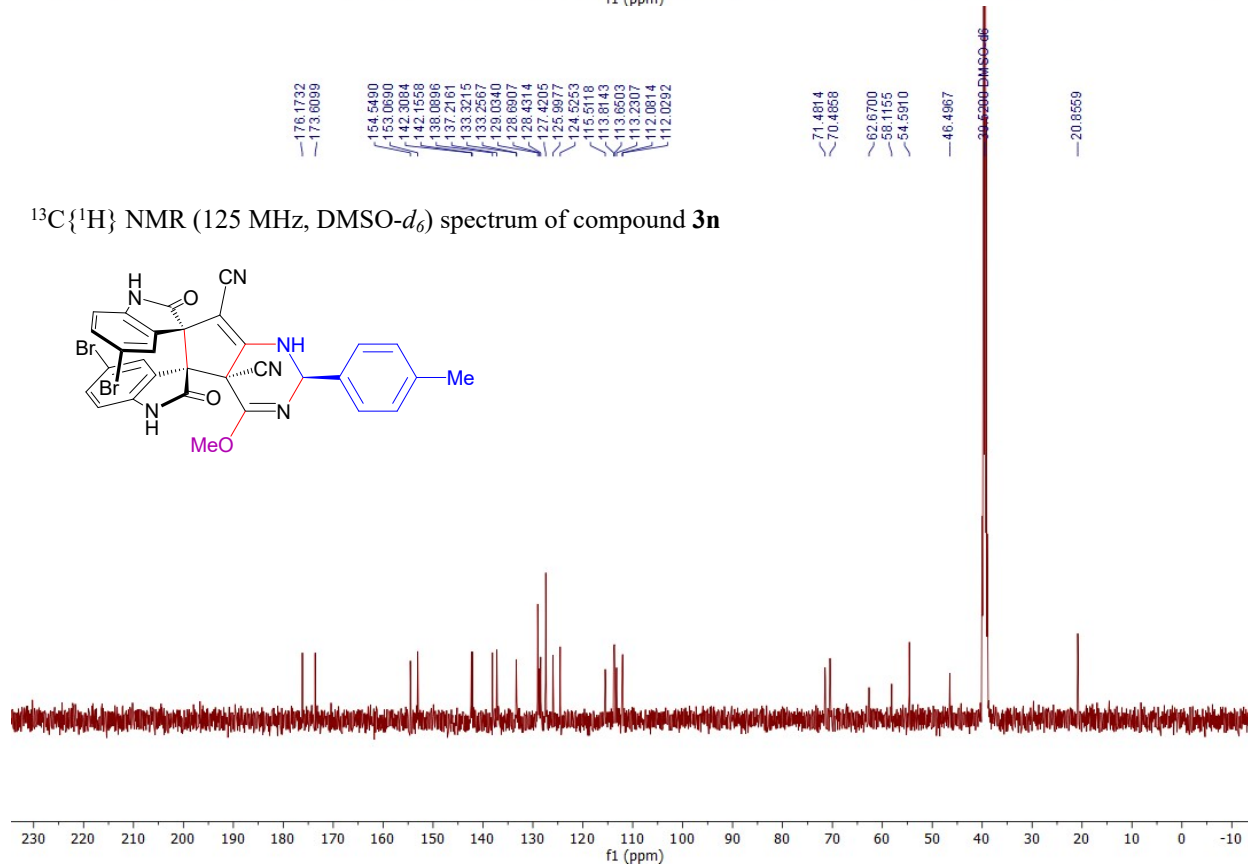



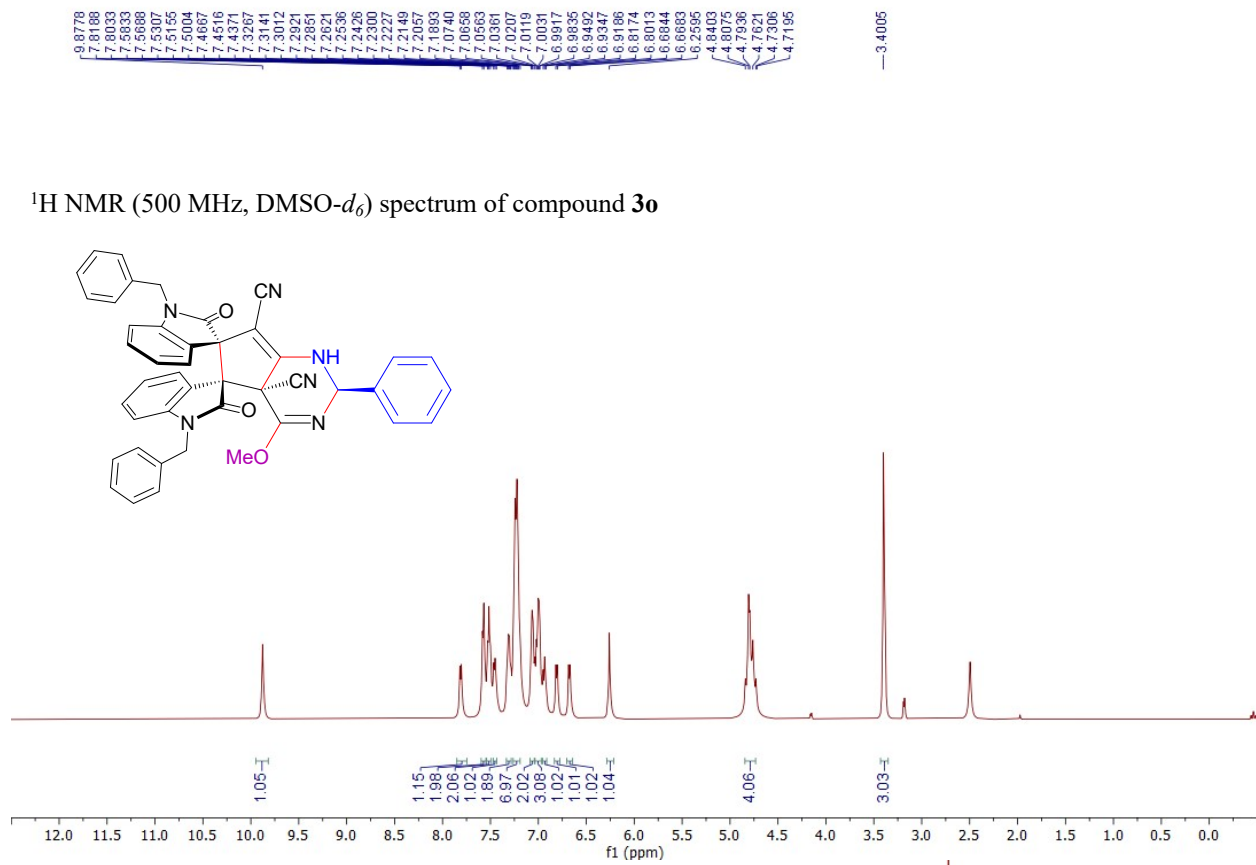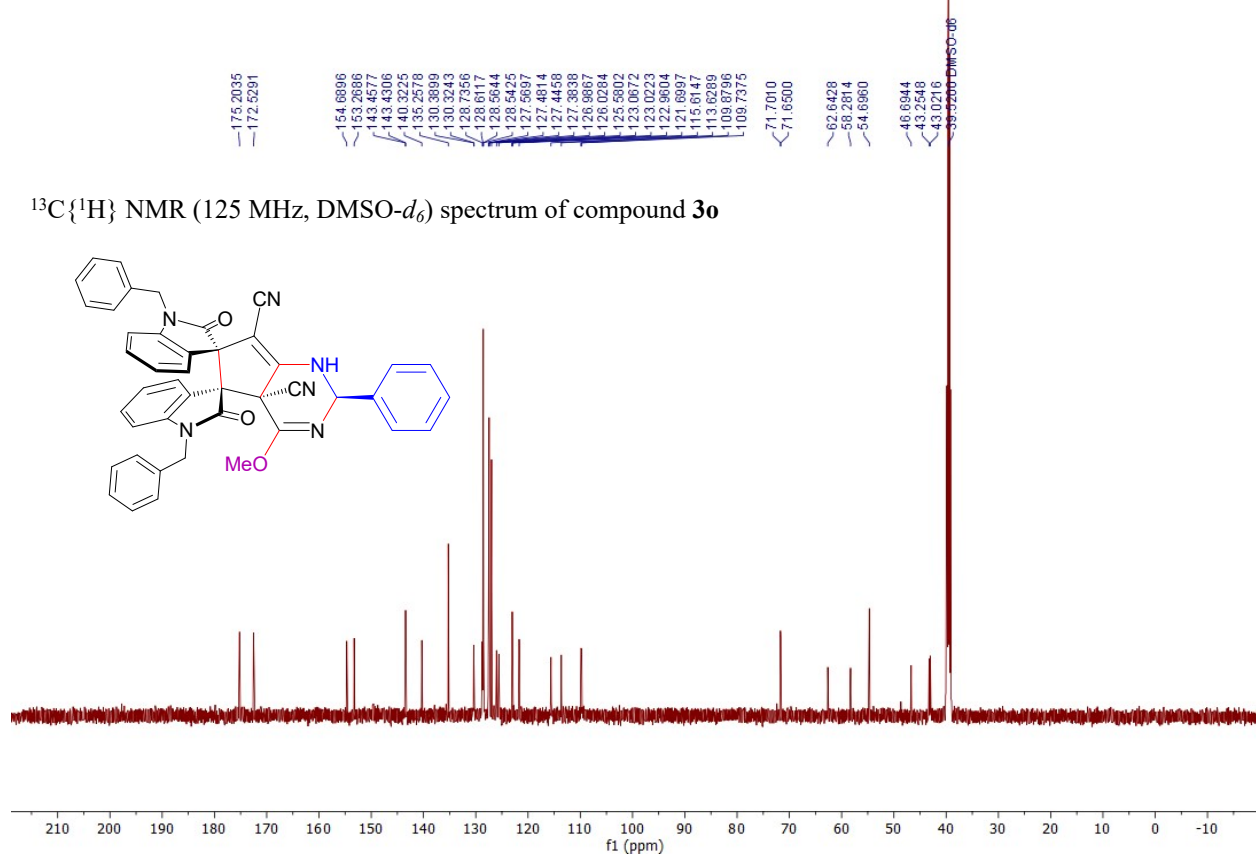

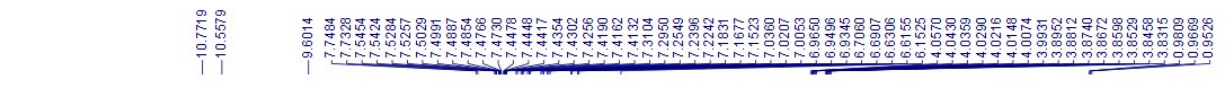

<sup>1</sup>H NMR (500 MHz, DMSO-*d*<sub>6</sub>) spectrum of compound **3p**

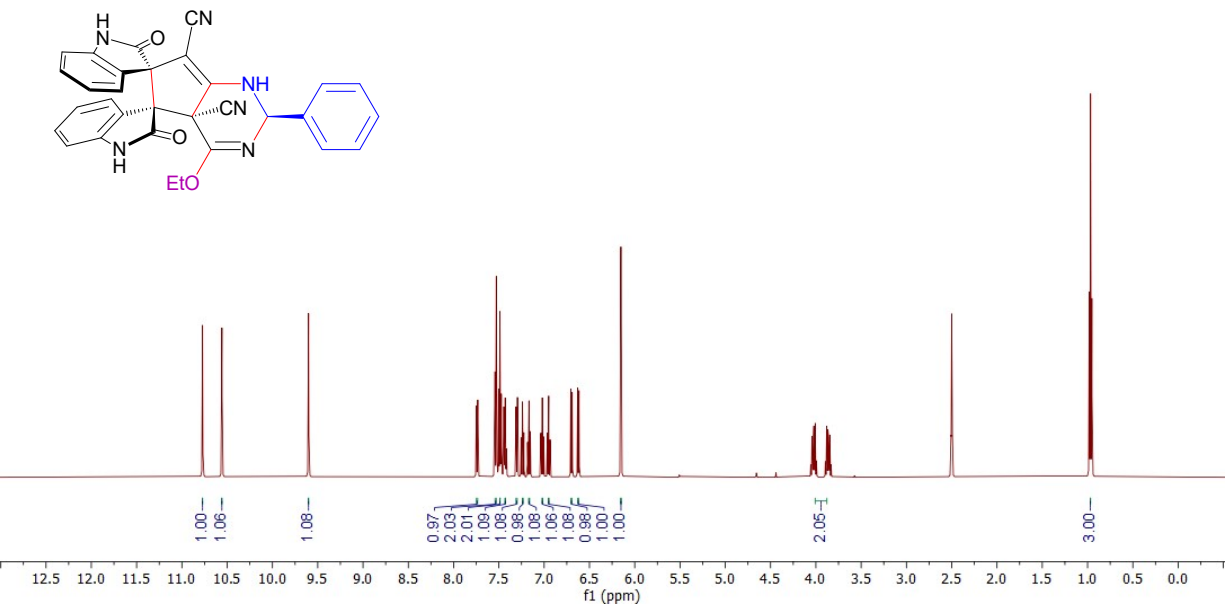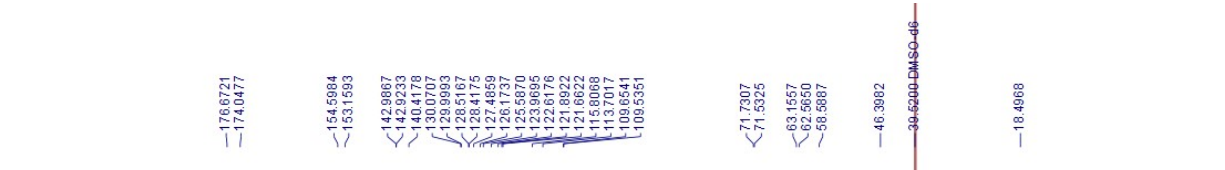

<sup>13</sup>C{<sup>1</sup>H} NMR (125 MHz, DMSO-*d*<sub>6</sub>) spectrum of compound **3p**

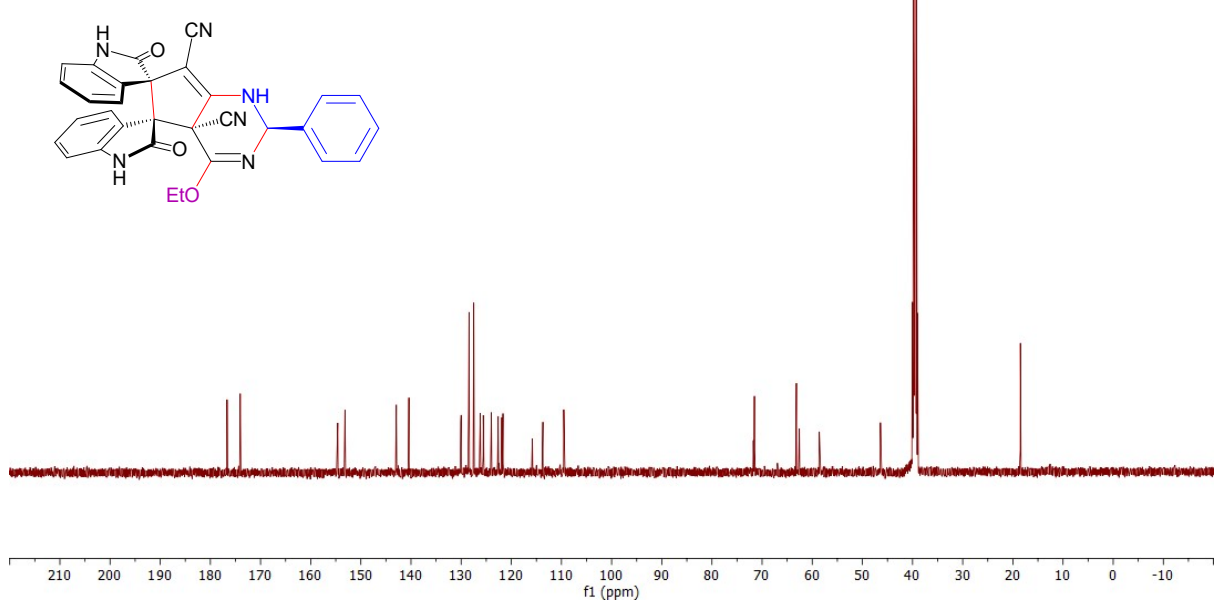

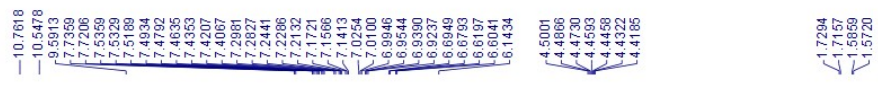

$^1\text{H}$  NMR (500 MHz,  $\text{DMSO-}d_6$ ) spectrum of compound **3q**

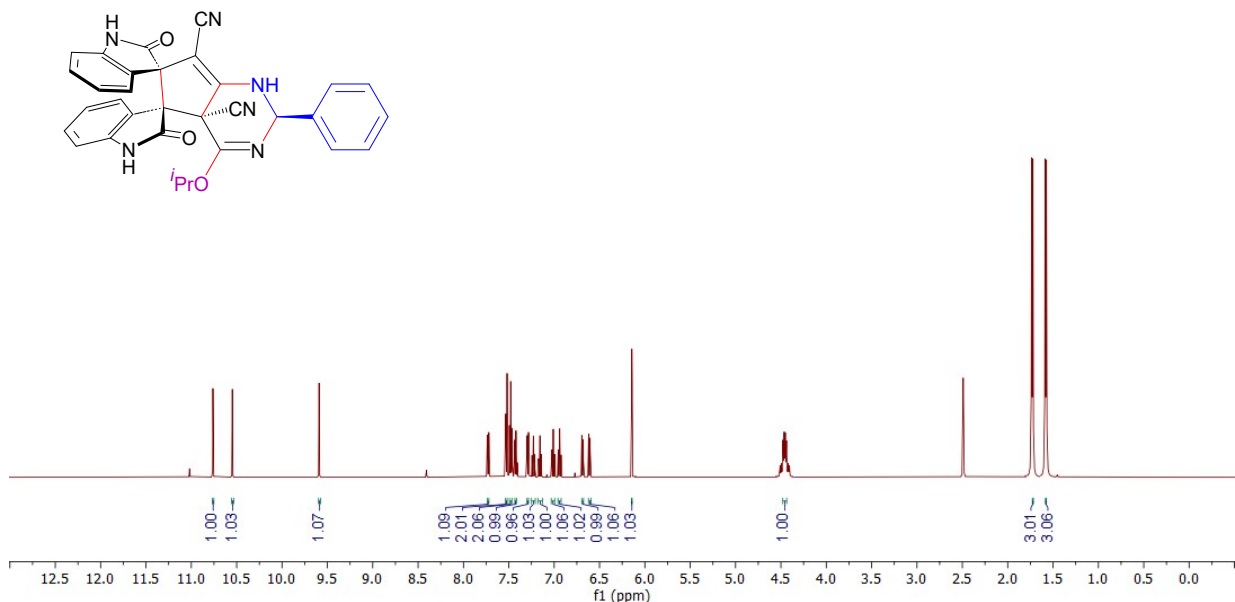

$^{13}\text{C}\{^1\text{H}\}$  NMR (125 MHz,  $\text{DMSO-}d_6$ ) spectrum of compound **3q**

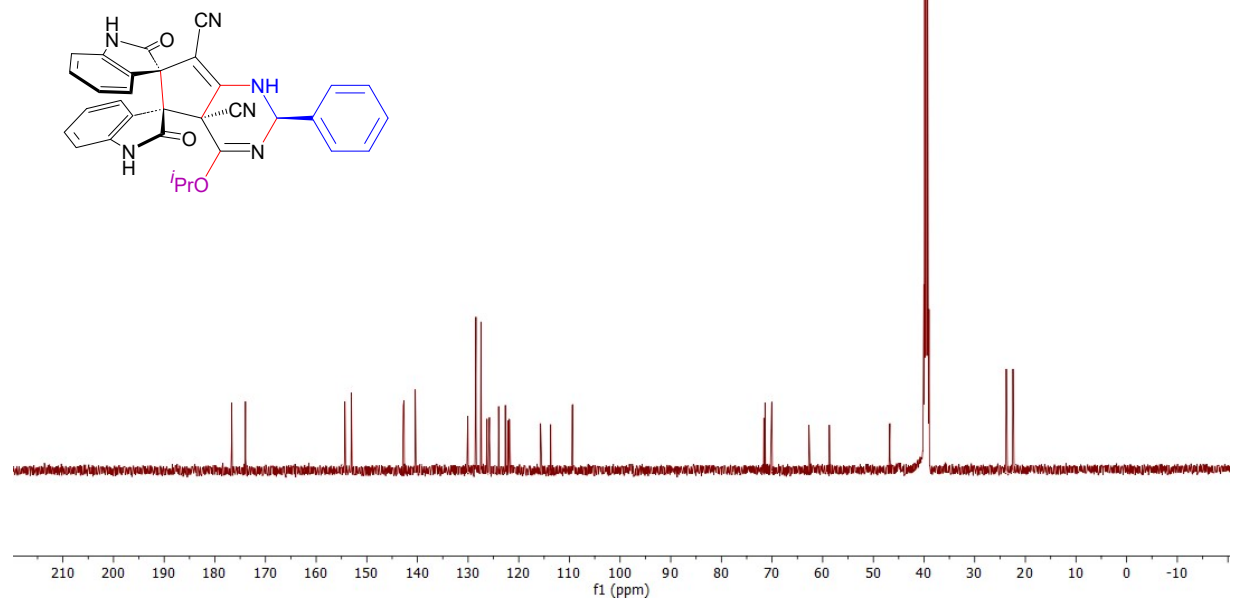

Supplement: d4ob01811g1.pdf [file d4ob01811g1.pdf]
